# Supplementary material for: Landscape of the oncogenic role of fatty acid synthase in human tumors
Source: publisher site journal article supplement (doi:10.18632/aging.203730), 2021-12-08
Supplement: Supplementary file [file aging-v13i23-203730-supplementary-material-SD2.pdf]

## SUPPLEMENTARY TABLES

Supplementary Table 1. Correlation of FASN and the outcome of breast cancer in subgroup analysis.

| Factor            | Subgroup                  | Sample size | OS   |               | RFS  |                | DMFS |                | PPS  |                |
|-------------------|---------------------------|-------------|------|---------------|------|----------------|------|----------------|------|----------------|
|                   |                           |             | HR   | P             | HR   | P              | HR   | P              | HR   | P              |
| ER status         | ER positive               | 3499        | 1.22 | 0.2314        | 0.89 | 0.1831         | 1.14 | 0.3469         | 1.14 | 0.3469         |
|                   | ER negative               | 2168        | 0.61 | <b>0.0279</b> | 0.84 | 0.0802         | 0.72 | <b>0.0403</b>  | 0.72 | <b>0.0403</b>  |
| TP53 status       | mutated                   | 272         | 0.68 | 0.2892        | 1.55 | 0.075          | 0.56 | 0.2083         | 0.56 | 0.2083         |
|                   | Wild type                 | 388         | 1.6  | 0.2105        | 2.11 | <b>0.0058</b>  | 2.65 | <b>0.0192</b>  | 2.65 | <b>0.0192</b>  |
| PR status         | PR positive               | 1559        | 2.27 | 0.0673        | 0.84 | 0.3087         | 0.81 | <b>0.3891</b>  | 0.81 | <b>0.3891</b>  |
|                   | PR negative               | 1989        | 1.39 | 0.1936        | 0.81 | 0.0793         | 1.4  | 0.0621         | 1.4  | 0.0621         |
| HER2 status       | HER2 positive             | 1273        | 0.67 | <b>0.0299</b> | 0.78 | 0.053          | 0.77 | 0.1802         | 0.77 | 0.1802         |
|                   | HER2 negative             | 6262        | 0.73 | <b>0.0058</b> | 0.71 | <b>7.1e-09</b> | 0.63 | <b>2.9e-07</b> | 0.63 | <b>2.9e-07</b> |
| Grade             | Grade 1                   | 576         | 0.38 | <b>0.0394</b> | 0.39 | <b>0.0103</b>  | 0.57 | 0.1728         | 0.57 | 0.1728         |
|                   | Grade 2                   | 1795        | 1.57 | 0.0543        | 1.14 | 0.3026         | 0.77 | 0.0714         | 0.77 | 0.0714         |
|                   | Grade 3                   | 2058        | 0.74 | 0.0549        | 0.83 | 0.0503         | 0.71 | <b>0.0096</b>  | 0.71 | <b>0.0096</b>  |
| Intrinsic subtype | Basal                     | 1494        | 0.81 | 0.2772        | 0.57 | <b>4.7e-07</b> | 0.78 | 0.1367         | 0.78 | 0.1367         |
|                   | Luminal A                 | 3511        | 0.77 | 0.1388        | 0.79 | <b>0.0108</b>  | 0.82 | 0.1539         | 0.82 | 0.1539         |
|                   | Luminal B                 | 2015        | 0.82 | 0.3014        | 0.75 | <b>0.0091</b>  | 0.69 | <b>0.0094</b>  | 0.69 | <b>0.0094</b>  |
|                   | HER2+                     | 515         | 0.37 | <b>0.0005</b> | 0.7  | <b>0.0497</b>  | 0.64 | 0.0777         | 0.64 | 0.0777         |
| Lymph node status | Lymph node positive       | 2153        | 0.61 | <b>0.0037</b> | 0.69 | <b>1.1e-05</b> | 0.55 | <b>2.5e-06</b> | 0.55 | <b>2.5e-06</b> |
|                   | Lymph node negative       | 2829        | 0.69 | 0.0596        | 0.85 | 0.0779         | 0.65 | <b>0.0016</b>  | 0.65 | <b>0.0016</b>  |
| Pietenpol subtype | Basal-like 1              | 418         | 1.65 | 0.2114        | 0.52 | <b>0.0047</b>  | 1.69 | 0.096          | 1.69 | 0.096          |
|                   | Basal-like 2              | 165         | 5.76 | <b>0.0002</b> | 1.64 | 0.1821         | 1.93 | 0.0823         | 1.93 | 0.0823         |
|                   | immunomodulatory          | 462         | 0.54 | 0.1878        | 0.6  | 0.0434         | 0.46 | <b>0.0304</b>  | 0.46 | <b>0.0304</b>  |
|                   | Mesenchymal               | 382         | 0.39 | <b>0.0084</b> | 0.46 | <b>0.0001</b>  | 0.51 | <b>0.0281</b>  | 0.51 | <b>0.0281</b>  |
|                   | Mesenchymal stem-like     | 201         | 0.27 | <b>0.0074</b> | 0.41 | <b>0.0125</b>  | 0.37 | 0.0502         | 0.37 | 0.0502         |
|                   | Luminal androgen receptor | 413         | 0.4  | <b>0.002</b>  | 0.56 | <b>0.0033</b>  | 0.66 | <b>0.1525</b>  | 0.66 | <b>0.1525</b>  |

Abbreviations: HR: hazard ratio; OS: overall survival; RFS: relapse free survival; DMFS: distant metastasis free survival; ER: Estrogen receptor; PR: Progesterone receptor; HER2: human epidermal growth factor receptor-2; TP53: Tumor Protein P53; NA: not available data. *P* value less than 0.05 is shown in bold.

Supplementary Table 2. Correlation of FASN and the outcome of lung cancer in subgroup analysis.

| Factor                 | Subgroup                       | Sample size | OS   |                | FP   |                | PPS       |               |
|------------------------|--------------------------------|-------------|------|----------------|------|----------------|-----------|---------------|
|                        |                                |             | HR   | <i>P</i>       | HR   | <i>p</i>       | <i>HR</i> | <i>p</i>      |
| <b>Histology</b>       | adenocarcinoma                 | 865         | 2.14 | <b>9.4e-09</b> | 1.49 | <b>0.0129</b>  | 1.84      | <b>0.0097</b> |
|                        | squamous cell carcinoma        | 675         | 1.2  | 0.1415         | 1.38 | 0.2151         | 0.35      | 0.0645        |
| <b>gender</b>          | female                         | 817         | 2.54 | <b>5.8e-09</b> | 2.01 | <b>7.8e-05</b> | 1.77      | <b>0.0064</b> |
|                        | male                           | 1387        | 1.29 | <b>0.0013</b>  | 1.7  | <b>7.2e-05</b> | 1.45      | <b>0.0463</b> |
| <b>smoking history</b> | exclude those never smoked     | 970         | 1.74 | <b>3.0e-05</b> | 1.55 | <b>0.0004</b>  | 1.16      | 0.3048        |
|                        | only those never smoked        | 247         | 3.44 | <b>2.3e-05</b> | 2.05 | <b>0.0026</b>  | 2.6       | <b>0.0031</b> |
| <b>stage</b>           | stage I                        | 652         | 3.16 | <b>0.0157</b>  | 0.34 | <b>0.0046</b>  | 3.22      | <b>0.0358</b> |
|                        | stage II                       | 320         | 2.47 | 0.1393         | 3.46 | <b>0.009</b>   | NA        | NA            |
| <b>grade</b>           | grade II                       | 310         | 2.52 | <b>0.0107</b>  | 0.23 | 0.0613         | NA        | NA            |
| <b>AJCC stage t</b>    | t1                             | 475         | 1.26 | 0.1213         | 3.12 | 0.0841         | NA        | NA            |
|                        | t2                             | 686         | 0.52 | 0.1526         | 0.67 | 0.3663         | 0.69      | <b>0.5304</b> |
| <b>AJCC stage n</b>    | n0                             | 863         | 0.39 | <b>0.0396</b>  | 1.99 | 0.1257         | 1.89      | 0.4025        |
| <b>AJCC stage m</b>    | m0                             | 818         | 0.46 | 0.1932         | 0.23 | <b>0.0117</b>  | NA        | NA            |
| <b>surgery</b>         | only surgical margins negative | 730         | 3.84 | <b>0.0001</b>  | 2.93 | <b>9.4e-05</b> | 2.78      | <b>0.0078</b> |
| <b>radiotherapy</b>    | no                             | 276         | 0.39 | 0.1143         | 0.48 | 0.2646         | NA        | NA            |
| <b>chemotherapy</b>    | no                             | 317         | 1.52 | 0.4613         | 2.26 | 0.2962         | NA        | NA            |

Abbreviations: HR: hazard ratio; AJCC: American Joint Committee on Cancer; OS: overall survival; FP: first progression; PPS: post progression survival; NA: not available data. *P* value less than 0.05 is shown in bold.

Supplementary Table 3. Correlation of FASN and the outcome of ovarian cancer in subgroup analysis.

| Factor               | Subgroup              | Sample size | OS   |                | PFS  |               | PPS  |               |
|----------------------|-----------------------|-------------|------|----------------|------|---------------|------|---------------|
|                      |                       |             | HR   | <i>p</i>       | HR   | <i>p</i>      | HR   | <i>p</i>      |
| <b>Histology</b>     | Endometrioid          | 62          | 3.28 | 0.1677         | 3.89 | 0.1548        | NA   | NA            |
|                      | Serous                | 1232        | 1.13 | 0.1439         | 1.29 | <b>0.0014</b> | 1.31 | <b>0.0043</b> |
| <b>Stage</b>         | Stage 1               | 107         | 1.89 | 0.2613         | 2.28 | 0.1184        | NA   | NA            |
|                      | Stage 2               | 72          | 1.88 | <b>0.2354</b>  | 3.01 | <b>0.0326</b> | 2.69 | 0.0923        |
|                      | Stage 3               | 1079        | 0.88 | <b>0.122</b>   | 1.22 | <b>0.0161</b> | 1.22 | <b>0.048</b>  |
|                      | Stage 4               | 189         | 1.57 | <b>0.018</b>   | 1.33 | 0.1413        | 1.39 | 0.1421        |
| <b>Grade</b>         | Grade 1               | 56          | 1.52 | 0.3954         | 0.44 | 0.1315        | NA   | NA            |
|                      | Grade 2               | 325         | 0.78 | 0.1418         | 1.4  | 0.0592        | 1.33 | 0.1478        |
|                      | Grade 3               | 1024        | 0.87 | 0.0895         | 1.17 | 0.0627        | 1.23 | <b>0.0597</b> |
|                      | Grade 4               | 21          | 0.59 | 0.3614         | NA   | NA            | NA   | NA            |
| <b>TP53 mutation</b> | Mutated               | 516         | 1.4  | <b>0.0036</b>  | 1.57 | <b>0.0001</b> | 1.53 | <b>0.0008</b> |
|                      | Wild type             | 102         | 1.84 | <b>0.0272</b>  | 0.71 | 0.2007        | 2.05 | <b>0.0193</b> |
| <b>Debulk</b>        | optimal               | 802         | 0.64 | <b>1.5e-05</b> | 0.74 | <b>0.0023</b> | 0.7  | <b>0.0064</b> |
|                      | suboptimal            | 536         | 0.83 | 0.1182         | 0.85 | 0.1764        | 1.43 | <b>0.0077</b> |
| <b>Chemotherapy</b>  | Contains platin       | 1438        | 0.92 | <b>0.2755</b>  | 0.86 | <b>0.0343</b> | 1.28 | <b>0.0056</b> |
|                      | Contains Taxol        | 821         | 0.78 | <b>0.0105</b>  | 0.79 | <b>0.0108</b> | 1.17 | 0.1722        |
|                      | Contains Taxol+platin | 804         | 0.8  | <b>0.021</b>   | 0.82 | <b>0.0314</b> | 1.17 | 0.1647        |
|                      | Contains Avastin      | 50          | 0.64 | 0.3165         | 1.54 | 0.2075        | 0.62 | 0.286         |
|                      | Contains Docetaxel    | 108         | 1.47 | 0.233          | 1.53 | 0.0853        | 1.57 | 0.2054        |
|                      | Contains Gemcitabine  | 135         | 0.73 | 0.1477         | 0.73 | 0.1155        | 0.67 | 0.0739        |
|                      | Contains Paclitaxel   | 248         | 1.5  | 0.0856         | 1.58 | <b>0.0076</b> | 1.68 | 0.0506        |
|                      | Contains Topotecan    | 119         | 0.56 | <b>0.0097</b>  | 1.26 | 0.2572        | 0.56 | <b>0.0068</b> |

Abbreviations: HR: hazard ratio; OS: overall survival; PFS: progress free survival; PPS: post progression survival; TP53: Tumor Protein P53; NA: not available data. *P* value less than 0.05 is shown in bold.

Supplementary Table 4. Correlation of FASN and outcome of gastric cancer in subgroup analysis.

| Factor                       | Subgroup            | Sample size | OS   |                | FP   |                | PPS  |                   |
|------------------------------|---------------------|-------------|------|----------------|------|----------------|------|-------------------|
|                              |                     |             | HR   | <i>P</i>       | HR   | <i>P</i>       | HR   | <i>P</i>          |
| <b>Gender</b>                | Female              | 244         | 2.2  | <b>1.0e-05</b> | 2.06 | <b>0.0001</b>  | 2.67 | <b>2.3e-06</b>    |
|                              | Male                | 566         | 2.34 | <b>2.1e-12</b> | 2.18 | <b>9.8e-11</b> | 3.25 | <b>&lt; 1e-16</b> |
| <b>Stage</b>                 | Stage 1             | 69          | 3.41 | <b>0.0263</b>  | 2.33 | <b>0.1551</b>  | 4.08 | <b>0.0474</b>     |
|                              | Stage 2             | 145         | 1.85 | 0.0506         | 1.63 | 0.1271         | 1.83 | 0.067             |
|                              | Stage 3             | 319         | 2.26 | <b>1.3e-06</b> | 1.94 | <b>0.0008</b>  | 2.75 | <b>2.6e-06</b>    |
|                              | Stage 4             | 152         | 1.57 | <b>0.023</b>   | 1.54 | <b>0.0349</b>  | 1.82 | <b>0.0135</b>     |
| <b>Stage t</b>               | t2                  | 253         | 1.87 | <b>0.0044</b>  | 1.78 | <b>0.006</b>   | 2.08 | <b>0.0016</b>     |
|                              | t3                  | 208         | 1.76 | <b>0.0014</b>  | 1.6  | <b>0.0128</b>  | 2.42 | <b>4.8e-06</b>    |
|                              | t4                  | 39          | 0.72 | 0.4482         | 1.37 | 0.4223         | 0.48 | 0.1121            |
| <b>Stage n</b>               | n0                  | 76          | 1.81 | 0.1747         | 1.76 | 0.1894         | 0.55 | 0.3446            |
|                              | n1                  | 232         | 2.13 | <b>0.0002</b>  | 2.15 | <b>0.0008</b>  | 3.3  | <b>2.3e-07</b>    |
|                              | n2                  | 129         | 2.46 | <b>7.0e-05</b> | 2.01 | <b>0.0014</b>  | 2.62 | <b>6.5e-05</b>    |
|                              | n3                  | 76          | 1.54 | 0.1166         | 1.44 | 0.1824         | 1.56 | 0.146             |
| <b>Stage m</b>               | m0                  | 459         | 1.72 | <b>0.0001</b>  | 1.53 | <b>0.0015</b>  | 2.38 | <b>6.9e-09</b>    |
|                              | m1                  | 58          | 1.78 | <b>0.0493</b>  | 1.37 | 0.2871         | 3.15 | <b>0.0037</b>     |
| <b>HER2</b>                  | negative            | 641         | 1.92 | <b>1.6e-08</b> | 1.95 | <b>6.9e-07</b> | 2.56 | <b>1.9e-10</b>    |
|                              | positive            | 424         | 1.89 | <b>3.9e-05</b> | 2.59 | <b>6.6e-09</b> | 5.07 | <b>3.1e-11</b>    |
| <b>Lauren classification</b> | Intestinal          | 336         | 2.53 | <b>5.3e-09</b> | 1.94 | <b>0.0004</b>  | 3.87 | <b>2.6e-11</b>    |
|                              | Diffuse             | 248         | 1.76 | <b>0.0029</b>  | 1.61 | <b>0.0115</b>  | 1.61 | <b>0.0195</b>     |
|                              | Mixed               | 33          | 0.36 | 0.1051         | 0.44 | 0.1198         | NA   | NA                |
| <b>Differentiation</b>       | Poorly              | 166         | 1.36 | 0.1344         | 1.34 | 0.2102         | 1.35 | 0.3727            |
|                              | Moderately          | 67          | 1.64 | 0.1359         | 1.42 | 0.3195         | 4.23 | <b>0.0032</b>     |
|                              | Well                | 32          | 2.06 | 0.1872         | NA   | NA             | NA   | NA                |
| <b>Treatment</b>             | Surgery alone       | 393         | 1.43 | <b>0.0162</b>  | 1.25 | 0.1168         | 2.24 | <b>1.4e-06</b>    |
|                              | 5-Fu based adjuvant | 157         | 1.88 | <b>0.001</b>   | 1.97 | <b>0.0001</b>  | 1.24 | 0.238             |
| <b>Perforation</b>           | No                  | 169         | 1.15 | 0.4961         | 1.2  | 0.3664         | 1.74 | 0.0633            |

Abbreviations: HR: hazard ratio; OS: overall survival; FP: first progression; PPS: post progression survival; HER2: human epidermal growth factor receptor-2; NA: not available data. *P* value less than 0.05 is shown in bold.

Supplementary Table 5. Correlation of FASN and outcome of liver cancer in subgroup analysis.

| Factor                     | Subgroup | Sample size | OS   |               | PFS  |               | RFS  |               | DSS  |               |
|----------------------------|----------|-------------|------|---------------|------|---------------|------|---------------|------|---------------|
|                            |          |             | HR   | P             | HR   | P             | HR   | P             | HR   | P             |
| <b>Stage</b>               | Stage 1  | 171         | 1.56 | 0.2807        | 0.73 | 0.2046        | 0.62 | 0.0792        | 0.34 | 0.0685        |
|                            | Stage 2  | 86          | 2.73 | 0.0562        | 2.15 | <b>0.0134</b> | 2.3  | <b>0.0164</b> | 2.35 | 0.1307        |
|                            | Stage 3  | 85          | 0.53 | 0.0511        | 1.54 | 0.1182        | 1.71 | 0.0763        | 0.58 | 0.1695        |
| <b>Grade</b>               | Grade 1  | 55          | 0.56 | 0.2875        | 0.63 | 0.2346        | 0.33 | <b>0.0199</b> | 0.5  | 0.3097        |
|                            | Grade 2  | 177         | 2.01 | <b>0.0105</b> | 1.77 | <b>0.0182</b> | 1.8  | <b>0.0205</b> | 2.58 | <b>0.0053</b> |
|                            | Grade 3  | 122         | 1.41 | 0.2612        | 1.74 | <b>0.0297</b> | 1.64 | 0.0713        | 1.43 | 0.347         |
| <b>AJCC_T</b>              | T1       | 181         | 1.51 | 0.2861        | 0.79 | 0.3241        | 0.67 | 0.1283        | 0.62 | 0.3015        |
|                            | T2       | 94          | 1.99 | 0.0654        | 2.09 | <b>0.0106</b> | 2.4  | <b>0.0073</b> | 2.03 | 0.1478        |
|                            | T3       | 80          | 0.39 | <b>0.0036</b> | 1.53 | 0.1383        | 1.68 | 0.0998        | 0.4  | <b>0.0204</b> |
| <b>Gender</b>              | Female   | 121         | 1.72 | 0.059         | 1.48 | 0.165         | 1.39 | 0.3534        | 1.57 | 0.3201        |
|                            | Male     | 250         | 0.78 | 0.2945        | 1.34 | 0.1135        | 1.39 | 0.1314        | 1.4  | 0.2392        |
| <b>Vascular invasion</b>   | None     | 205         | 0.8  | 0.4055        | 1.35 | 0.2039        | 1.29 | 0.3093        | 0.73 | 0.3937        |
|                            | micro    | 93          | 1.95 | 0.1742        | 0.56 | <b>0.045</b>  | 0.58 | 0.0935        | 0.32 | <b>0.0487</b> |
| <b>Race</b>                | White    | 184         | 0.65 | 0.0851        | 0.7  | 0.0699        | 0.69 | 0.1061        | 0.69 | 0.2204        |
|                            | Asian    | 158         | 2.13 | 0.0605        | 1.73 | <b>0.0228</b> | 1.83 | <b>0.0183</b> | 2.22 | 0.133         |
| <b>Sorafenib treatment</b> | treated  | 30          | 1.97 | 0.2196        | 0.49 | 0.101         | 0.57 | 0.2987        | 1.97 | 0.2196        |
| <b>Alcohol consumption</b> | Yes      | 117         | 1.98 | 0.1211        | 2.03 | <b>0.0386</b> | 1.78 | 0.0651        | 2.05 | 0.0562        |
|                            | none     | 205         | 1.31 | 0.3425        | 0.63 | <b>0.0249</b> | 0.6  | <b>0.0245</b> | 0.55 | 0.0612        |
| <b>Hepatitis virus</b>     | Yes      | 153         | 0.49 | 0.0806        | 1.3  | 0.2643        | 1.35 | 0.2444        | 0.44 | 0.1206        |
|                            | none     | 169         | 1.59 | <b>0.0482</b> | 1.41 | 0.1555        | 0.78 | 0.3237        | 1.69 | 0.0771        |

Abbreviations: HR: hazard ratio; AJCC: American Joint Committee on Cancer; OS: overall survival; PFS: progress free survival; RFS: relapse free survival; DSS: disease specific survival; NA: not available data. *P* value less than 0.05 is shown in bold.

**Supplementary Table 6. Phosphorylation locus of FASN.**

| site         | sequence        | experimentally confirmed <sup>#</sup> | hydrophobicity | <i>p</i> -site similarity score | maximum kinase specificity | sum kinase specificity score | conservation score |
|--------------|-----------------|---------------------------------------|----------------|---------------------------------|----------------------------|------------------------------|--------------------|
| <b>S207</b>  | FLRLGMLSPEGTCKA | 24719451;<br>25850435                 | 0.253          | -57.6                           | 516                        | 20,583                       | 42.7               |
| <b>S724</b>  | IPEAQWHSSLARTSS | 20068231                              | -0.827         | -59.2                           | 273                        | 12,141                       | 30.9               |
| <b>S725</b>  | PEAQWHSLARTSSA  | 20068231                              | -1.007         | -57.5                           | 353                        | 15,253                       | 16.4               |
| <b>T976</b>  | FDHPESPTPNPTEPL | 18669648                              | -1.440         | -54.8                           | 278                        | 9,657                        | 9.7                |
| <b>S1174</b> | AQIPRDPSQQELPRL | 27251275                              | -1.267         | -55.3                           | 572                        | 20,371                       | 4.6                |
| <b>S1411</b> | RRPTPQDSPIFLPVD | 18669648                              | -0.860         | -56.2                           | 549                        | 21,758                       | 10.6               |
| <b>S2198</b> | SSKADEASELACPTP | 18669648                              | -0.760         | -55.9                           | 289                        | 13,190                       | 1.5                |
| <b>T2204</b> | ASELACPTPKEDGLA | 15302935                              | -0.320         | -55.5                           | 283                        | 9,599                        | 14.2               |

<sup>#</sup>The PMID (PubMed Unique Identifier) information of the publication was provided.
