# Supplementary material for: Landscape of the oncogenic role of fatty acid synthase in human tumors
Source: Aging (Albany NY). 2021 Dec 8;13(23):25106–37. doi: 10.18632/aging.203730 (PMC8714155; doi:10.18632/aging.203730)
Supplement: Supplementary Table 7 [file aging-13-203730-s003.xlsx]

## Sheet: Supplementary Table 7
Supplementary Table 7. Correlation of FASN with FASN CD4+ T-cells and NK cells based on the TIMER2 database.
cancer	infiltrates	rho	p	adj.p
ACC (n=79)	NK cell activated_CIBERSORT	-0.00664451	0.955508	0.982779
ACC (n=79)	NK cell activated_CIBERSORT-ABS	0.0741867	0.532778	0.749835
ACC (n=79)	NK cell resting_CIBERSORT	-0.0663445	0.577064	0.775404
ACC (n=79)	NK cell resting_CIBERSORT-ABS	-0.0213508	0.857707	0.944174
ACC (n=79)	NK cell_EPIC	-0.0343747	0.7728	0.901477
ACC (n=79)	NK cell_MCPCOUNTER	-0.102724	0.387139	0.64008
ACC (n=79)	NK cell_QUANTISEQ	-0.275801	0.0181876	0.0884849
ACC (n=79)	NK cell_XCELL	-0.193489	0.100969	0.297889
ACC (n=79)	T cell CD4+ (non-regulatory)_QUANTISEQ	-0.00247216	0.983439	0.992687
ACC (n=79)	T cell CD4+ (non-regulatory)_XCELL	-0.00877362	0.941273	0.978348
ACC (n=79)	T cell CD4+ central memory_XCELL	-0.0945725	0.426109	0.661444
ACC (n=79)	T cell CD4+ effector memory_XCELL	-0.263101	0.0245177	0.110388
ACC (n=79)	T cell CD4+ memory activated_CIBERSORT	0.0114017	0.923728	0.96966
ACC (n=79)	T cell CD4+ memory activated_CIBERSORT-ABS	0.0114017	0.923728	0.96966
ACC (n=79)	T cell CD4+ memory resting_CIBERSORT	-0.153905	0.193591	0.442383
ACC (n=79)	T cell CD4+ memory resting_CIBERSORT-ABS	-0.0797648	0.502337	0.726581
ACC (n=79)	T cell CD4+ memory_XCELL	-0.151155	0.20177	0.449957
ACC (n=79)	T cell CD4+ naive_CIBERSORT	-0.08779	0.460174	0.692814
ACC (n=79)	T cell CD4+ naive_CIBERSORT-ABS	-0.0844601	0.477429	0.709793
ACC (n=79)	T cell CD4+ naive_XCELL	-0.195511	0.0973878	0.291856
ACC (n=79)	T cell CD4+ Th1_XCELL	0.174957	0.138745	0.372432
ACC (n=79)	T cell CD4+ Th2_XCELL	0.393014	0.000582862	0.00675267
ACC (n=79)	T cell CD4+_EPIC	0.0192059	0.871874	0.950954
ACC (n=79)	T cell CD4+_TIMER	0.0051367	0.965597	0.983681
BLCA (n=408)	NK cell activated_CIBERSORT	-0.121312	0.0199195	0.0943479
BLCA (n=408)	NK cell activated_CIBERSORT-ABS	-0.173276	0.000843869	0.00862017
BLCA (n=408)	NK cell resting_CIBERSORT	0.0555576	0.287793	0.547386
BLCA (n=408)	NK cell resting_CIBERSORT-ABS	0.049665	0.342069	0.606279
BLCA (n=408)	NK cell_EPIC	-0.125601	0.0159178	0.0804357
BLCA (n=408)	NK cell_MCPCOUNTER	-0.185603	0.000344214	0.00436004
BLCA (n=408)	NK cell_QUANTISEQ	0.00684562	0.895873	0.958896
BLCA (n=408)	NK cell_XCELL	-0.0254495	0.626525	0.815341
BLCA (n=408)	T cell CD4+ (non-regulatory)_QUANTISEQ	0.000419564	0.9936	0.996748
BLCA (n=408)	T cell CD4+ (non-regulatory)_XCELL	-0.0279049	0.593624	0.789835
BLCA (n=408)	T cell CD4+ central memory_XCELL	-0.00813195	0.876451	0.952153
BLCA (n=408)	T cell CD4+ effector memory_XCELL	-0.231116	7.48972e-06	0.000192304
BLCA (n=408)	T cell CD4+ memory activated_CIBERSORT	-0.166152	0.00138016	0.0127296
BLCA (n=408)	T cell CD4+ memory activated_CIBERSORT-ABS	-0.17171	0.000941812	0.00894722
BLCA (n=408)	T cell CD4+ memory resting_CIBERSORT	-0.107886	0.0385828	0.156639
BLCA (n=408)	T cell CD4+ memory resting_CIBERSORT-ABS	-0.131376	0.0116493	0.0632391
BLCA (n=408)	T cell CD4+ memory_XCELL	-0.0995865	0.0563074	0.200603
BLCA (n=408)	T cell CD4+ naive_CIBERSORT	0.100675	0.0536543	0.195294
BLCA (n=408)	T cell CD4+ naive_CIBERSORT-ABS	0.103276	0.0477324	0.180661
BLCA (n=408)	T cell CD4+ naive_XCELL	-0.0512506	0.326861	0.590338
BLCA (n=408)	T cell CD4+ Th1_XCELL	-0.203419	8.48922e-05	0.00139338
BLCA (n=408)	T cell CD4+ Th2_XCELL	0.0279956	0.592424	0.789345
BLCA (n=408)	T cell CD4+_EPIC	-0.0422579	0.418946	0.655682
BLCA (n=408)	T cell CD4+_TIMER	-0.253691	8.18208e-07	2.9896e-05
BRCA (n=1100)	NK cell activated_CIBERSORT	-0.0769345	0.0152614	0.077531
BRCA (n=1100)	NK cell activated_CIBERSORT-ABS	-0.0784021	0.0134157	0.070027
BRCA (n=1100)	NK cell resting_CIBERSORT	0.0806982	0.010922	0.0606121
BRCA (n=1100)	NK cell resting_CIBERSORT-ABS	0.0797928	0.0118515	0.063971
BRCA (n=1100)	NK cell_EPIC	-0.0621405	0.0501622	0.185938
BRCA (n=1100)	NK cell_MCPCOUNTER	-0.107032	0.000725011	0.00782682
BRCA (n=1100)	NK cell_QUANTISEQ	-0.0526446	0.0971506	0.291856
BRCA (n=1100)	NK cell_XCELL	0.0162325	0.609235	0.802934
BRCA (n=1100)	T cell CD4+ (non-regulatory)_QUANTISEQ	0.164098	1.96699e-07	9.34321e-06
BRCA (n=1100)	T cell CD4+ (non-regulatory)_XCELL	-0.0139376	0.66074	0.837072
BRCA (n=1100)	T cell CD4+ central memory_XCELL	0.0694705	0.028514	0.125054
BRCA (n=1100)	T cell CD4+ effector memory_XCELL	0.075867	0.0167405	0.0830946
BRCA (n=1100)	T cell CD4+ memory activated_CIBERSORT	-0.0819648	0.00973038	0.056365
BRCA (n=1100)	T cell CD4+ memory activated_CIBERSORT-ABS	-0.084116	0.0079696	0.0479987
BRCA (n=1100)	T cell CD4+ memory resting_CIBERSORT	0.0456225	0.150628	0.387797
BRCA (n=1100)	T cell CD4+ memory resting_CIBERSORT-ABS	0.00784866	0.804797	0.913227
BRCA (n=1100)	T cell CD4+ memory_XCELL	-0.0833517	0.00855956	0.0507483
BRCA (n=1100)	T cell CD4+ naive_CIBERSORT	0.044036	0.165355	0.404864
BRCA (n=1100)	T cell CD4+ naive_CIBERSORT-ABS	0.0436915	0.168692	0.406982
BRCA (n=1100)	T cell CD4+ naive_XCELL	-0.0824947	0.00926718	0.0540112
BRCA (n=1100)	T cell CD4+ Th1_XCELL	-0.0369788	0.244104	0.507647
BRCA (n=1100)	T cell CD4+ Th2_XCELL	-0.156724	6.84667e-07	2.60173e-05
BRCA (n=1100)	T cell CD4+_EPIC	0.0616193	0.0521226	0.191183
BRCA (n=1100)	T cell CD4+_TIMER	-0.159964	3.98557e-07	1.72104e-05
BRCA-Basal (n=191)	NK cell activated_CIBERSORT	0.0289547	0.704491	0.859135
BRCA-Basal (n=191)	NK cell activated_CIBERSORT-ABS	0.00527255	0.944951	0.979735
BRCA-Basal (n=191)	NK cell resting_CIBERSORT	0.111596	0.142641	0.372433
BRCA-Basal (n=191)	NK cell resting_CIBERSORT-ABS	0.120372	0.113621	0.323175
BRCA-Basal (n=191)	NK cell_EPIC	0.0810091	0.28795	0.547386
BRCA-Basal (n=191)	NK cell_MCPCOUNTER	-0.0785237	0.303045	0.565605
BRCA-Basal (n=191)	NK cell_QUANTISEQ	-0.0104714	0.890924	0.956743
BRCA-Basal (n=191)	NK cell_XCELL	0.0732623	0.336692	0.601235
BRCA-Basal (n=191)	T cell CD4+ (non-regulatory)_QUANTISEQ	-0.0227858	0.765369	0.896699
BRCA-Basal (n=191)	T cell CD4+ (non-regulatory)_XCELL	-0.0445313	0.559582	0.766365
BRCA-Basal (n=191)	T cell CD4+ central memory_XCELL	0.0876811	0.249949	0.511185
BRCA-Basal (n=191)	T cell CD4+ effector memory_XCELL	-0.0658156	0.388222	0.64008
BRCA-Basal (n=191)	T cell CD4+ memory activated_CIBERSORT	0.0677662	0.374284	0.636083
BRCA-Basal (n=191)	T cell CD4+ memory activated_CIBERSORT-ABS	0.04885	0.522098	0.742471
BRCA-Basal (n=191)	T cell CD4+ memory resting_CIBERSORT	-0.0242008	0.751262	0.886582
BRCA-Basal (n=191)	T cell CD4+ memory resting_CIBERSORT-ABS	-0.0446755	0.558309	0.766365
BRCA-Basal (n=191)	T cell CD4+ memory_XCELL	-0.112568	0.139172	0.372432
BRCA-Basal (n=191)	T cell CD4+ naive_CIBERSORT	0.108017	0.15598	0.396892
BRCA-Basal (n=191)	T cell CD4+ naive_CIBERSORT-ABS	0.107802	0.156809	0.396892
BRCA-Basal (n=191)	T cell CD4+ naive_XCELL	-0.18226	0.0160822	0.0808363
BRCA-Basal (n=191)	T cell CD4+ Th1_XCELL	0.0627621	0.41066	0.653379
BRCA-Basal (n=191)	T cell CD4+ Th2_XCELL	0.0691431	0.364633	0.626404
BRCA-Basal (n=191)	T cell CD4+_EPIC	0.0324546	0.67074	0.842278
BRCA-Basal (n=191)	T cell CD4+_TIMER	-0.0589438	0.439765	0.669514
BRCA-Her2 (n=82)	NK cell activated_CIBERSORT	0.0358258	0.765117	0.896699
BRCA-Her2 (n=82)	NK cell activated_CIBERSORT-ABS	0.0505841	0.67304	0.842278
BRCA-Her2 (n=82)	NK cell resting_CIBERSORT	-0.173526	0.144914	0.376144
BRCA-Her2 (n=82)	NK cell resting_CIBERSORT-ABS	-0.163945	0.16879	0.406982
BRCA-Her2 (n=82)	NK cell_EPIC	0.0201138	0.866818	0.948707
BRCA-Her2 (n=82)	NK cell_MCPCOUNTER	0.0664184	0.579355	0.777382
BRCA-Her2 (n=82)	NK cell_QUANTISEQ	0.123816	0.300099	0.563137
BRCA-Her2 (n=82)	NK cell_XCELL	-0.0489012	0.683331	0.842278
BRCA-Her2 (n=82)	T cell CD4+ (non-regulatory)_QUANTISEQ	-0.0487168	0.684462	0.842278
BRCA-Her2 (n=82)	T cell CD4+ (non-regulatory)_XCELL	0.0366195	0.760068	0.893645
BRCA-Her2 (n=82)	T cell CD4+ central memory_XCELL	0.225865	0.0564277	0.200603
BRCA-Her2 (n=82)	T cell CD4+ effector memory_XCELL	0.174653	0.142282	0.372433
BRCA-Her2 (n=82)	T cell CD4+ memory activated_CIBERSORT	-0.128454	0.282217	0.541629
BRCA-Her2 (n=82)	T cell CD4+ memory activated_CIBERSORT-ABS	-0.13365	0.263037	0.523868
BRCA-Her2 (n=82)	T cell CD4+ memory resting_CIBERSORT	-0.247482	0.0360889	0.153056
BRCA-Her2 (n=82)	T cell CD4+ memory resting_CIBERSORT-ABS	-0.0742816	0.535175	0.749876
BRCA-Her2 (n=82)	T cell CD4+ memory_XCELL	0.0422095	0.724802	0.869394
BRCA-Her2 (n=82)	T cell CD4+ naive_CIBERSORT	NA	NA	NA
BRCA-Her2 (n=82)	T cell CD4+ naive_CIBERSORT-ABS	NA	NA	NA
BRCA-Her2 (n=82)	T cell CD4+ naive_XCELL	0.0994845	0.405722	0.652176
BRCA-Her2 (n=82)	T cell CD4+ Th1_XCELL	0.0293711	0.806523	0.913227
BRCA-Her2 (n=82)	T cell CD4+ Th2_XCELL	-0.212261	0.0734486	0.239781
BRCA-Her2 (n=82)	T cell CD4+_EPIC	-0.0169584	0.887563	0.956743
BRCA-Her2 (n=82)	T cell CD4+_TIMER	-0.0346393	0.772683	0.901477
BRCA-LumA (n=568)	NK cell activated_CIBERSORT	-0.0788022	0.0734179	0.239781
BRCA-LumA (n=568)	NK cell activated_CIBERSORT-ABS	-0.0743306	0.0913445	0.281134
BRCA-LumA (n=568)	NK cell resting_CIBERSORT	0.168143	0.000122385	0.00184549
BRCA-LumA (n=568)	NK cell resting_CIBERSORT-ABS	0.167904	0.000125178	0.0018581
BRCA-LumA (n=568)	NK cell_EPIC	-0.0681609	0.121655	0.34092
BRCA-LumA (n=568)	NK cell_MCPCOUNTER	-0.0913408	0.0378765	0.155221
BRCA-LumA (n=568)	NK cell_QUANTISEQ	0.0849793	0.0534773	0.195294
BRCA-LumA (n=568)	NK cell_XCELL	0.00917627	0.835115	0.932267
BRCA-LumA (n=568)	T cell CD4+ (non-regulatory)_QUANTISEQ	0.0367205	0.404733	0.651689
BRCA-LumA (n=568)	T cell CD4+ (non-regulatory)_XCELL	0.0224936	0.609857	0.802934
BRCA-LumA (n=568)	T cell CD4+ central memory_XCELL	0.0315029	0.474767	0.708094
BRCA-LumA (n=568)	T cell CD4+ effector memory_XCELL	-0.0251496	0.568306	0.772376
BRCA-LumA (n=568)	T cell CD4+ memory activated_CIBERSORT	0.0212865	0.629175	0.81541
BRCA-LumA (n=568)	T cell CD4+ memory activated_CIBERSORT-ABS	0.0205528	0.641043	0.820743
BRCA-LumA (n=568)	T cell CD4+ memory resting_CIBERSORT	0.00610054	0.889942	0.956743
BRCA-LumA (n=568)	T cell CD4+ memory resting_CIBERSORT-ABS	-0.00288827	0.947765	0.979735
BRCA-LumA (n=568)	T cell CD4+ memory_XCELL	-0.0731308	0.0967093	0.291663
BRCA-LumA (n=568)	T cell CD4+ naive_CIBERSORT	0.0555766	0.207094	0.455415
BRCA-LumA (n=568)	T cell CD4+ naive_CIBERSORT-ABS	0.0552297	0.209948	0.458301
BRCA-LumA (n=568)	T cell CD4+ naive_XCELL	-0.0447175	0.310193	0.5722
BRCA-LumA (n=568)	T cell CD4+ Th1_XCELL	0.0466556	0.28967	0.548601
BRCA-LumA (n=568)	T cell CD4+ Th2_XCELL	-0.00544645	0.901679	0.958896
BRCA-LumA (n=568)	T cell CD4+_EPIC	0.0771291	0.0797567	0.25714
BRCA-LumA (n=568)	T cell CD4+_TIMER	-0.0500027	0.256417	0.520504
BRCA-LumB (n=219)	NK cell activated_CIBERSORT	0.0359218	0.620842	0.810165
BRCA-LumB (n=219)	NK cell activated_CIBERSORT-ABS	0.096535	0.182858	0.426819
BRCA-LumB (n=219)	NK cell resting_CIBERSORT	0.0634711	0.38178	0.64008
BRCA-LumB (n=219)	NK cell resting_CIBERSORT-ABS	0.061155	0.399428	0.647625
BRCA-LumB (n=219)	NK cell_EPIC	0.0318637	0.660846	0.837072
BRCA-LumB (n=219)	NK cell_MCPCOUNTER	-0.000248506	0.997271	0.997485
BRCA-LumB (n=219)	NK cell_QUANTISEQ	0.0633099	0.382993	0.64008
BRCA-LumB (n=219)	NK cell_XCELL	0.0123303	0.865212	0.94804
BRCA-LumB (n=219)	T cell CD4+ (non-regulatory)_QUANTISEQ	-0.0721494	0.31998	0.584578
BRCA-LumB (n=219)	T cell CD4+ (non-regulatory)_XCELL	-0.0456675	0.52936	0.747775
BRCA-LumB (n=219)	T cell CD4+ central memory_XCELL	0.0192496	0.790999	0.906453
BRCA-LumB (n=219)	T cell CD4+ effector memory_XCELL	0.0743953	0.305107	0.568337
BRCA-LumB (n=219)	T cell CD4+ memory activated_CIBERSORT	0.00820949	0.91002	0.961786
BRCA-LumB (n=219)	T cell CD4+ memory activated_CIBERSORT-ABS	0.00587212	0.935572	0.974555
BRCA-LumB (n=219)	T cell CD4+ memory resting_CIBERSORT	0.0593641	0.413401	0.653379
BRCA-LumB (n=219)	T cell CD4+ memory resting_CIBERSORT-ABS	0.0976865	0.177668	0.41882
BRCA-LumB (n=219)	T cell CD4+ memory_XCELL	-0.0570202	0.432116	0.666413
BRCA-LumB (n=219)	T cell CD4+ naive_CIBERSORT	0.0581429	0.423092	0.657836
BRCA-LumB (n=219)	T cell CD4+ naive_CIBERSORT-ABS	0.0581429	0.423092	0.657836
BRCA-LumB (n=219)	T cell CD4+ naive_XCELL	0.000228966	0.997485	0.997485
BRCA-LumB (n=219)	T cell CD4+ Th1_XCELL	0.0298436	0.681134	0.842278
BRCA-LumB (n=219)	T cell CD4+ Th2_XCELL	0.044437	0.540526	0.755146
BRCA-LumB (n=219)	T cell CD4+_EPIC	-0.203051	0.00473298	0.0324404
BRCA-LumB (n=219)	T cell CD4+_TIMER	0.0260818	0.71952	0.869141
CESC (n=306)	NK cell activated_CIBERSORT	-0.0300725	0.618234	0.808983
CESC (n=306)	NK cell activated_CIBERSORT-ABS	0.0157066	0.794675	0.90804
CESC (n=306)	NK cell resting_CIBERSORT	0.00739728	0.902455	0.958896
CESC (n=306)	NK cell resting_CIBERSORT-ABS	0.0118535	0.8443	0.935921
CESC (n=306)	NK cell_EPIC	-0.0571667	0.343172	0.607101
CESC (n=306)	NK cell_MCPCOUNTER	-0.0593666	0.324891	0.58902
CESC (n=306)	NK cell_QUANTISEQ	0.0156616	0.795252	0.90804
CESC (n=306)	NK cell_XCELL	-0.00761615	0.899584	0.958896
CESC (n=306)	T cell CD4+ (non-regulatory)_QUANTISEQ	-0.0403854	0.503253	0.726581
CESC (n=306)	T cell CD4+ (non-regulatory)_XCELL	0.0246899	0.682447	0.842278
CESC (n=306)	T cell CD4+ central memory_XCELL	-0.0681044	0.258616	0.521453
CESC (n=306)	T cell CD4+ effector memory_XCELL	-0.0649286	0.281535	0.541413
CESC (n=306)	T cell CD4+ memory activated_CIBERSORT	-0.0213619	0.723365	0.869394
CESC (n=306)	T cell CD4+ memory activated_CIBERSORT-ABS	-0.0149079	0.804902	0.913227
CESC (n=306)	T cell CD4+ memory resting_CIBERSORT	-0.029108	0.629546	0.81541
CESC (n=306)	T cell CD4+ memory resting_CIBERSORT-ABS	0.0115527	0.848202	0.936968
CESC (n=306)	T cell CD4+ memory_XCELL	0.102156	0.0897011	0.278484
CESC (n=306)	T cell CD4+ naive_CIBERSORT	-0.0882991	0.142701	0.372433
CESC (n=306)	T cell CD4+ naive_CIBERSORT-ABS	-0.0882991	0.142701	0.372433
CESC (n=306)	T cell CD4+ naive_XCELL	-0.0582904	0.333753	0.600381
CESC (n=306)	T cell CD4+ Th1_XCELL	-0.0702658	0.243773	0.507647
CESC (n=306)	T cell CD4+ Th2_XCELL	0.118666	0.0484909	0.182803
CESC (n=306)	T cell CD4+_EPIC	0.0846846	0.159847	0.399619
CESC (n=306)	T cell CD4+_TIMER	-0.0678272	0.260563	0.522226
CHOL (n=36)	NK cell activated_CIBERSORT	-0.201228	0.246394	0.507647
CHOL (n=36)	NK cell activated_CIBERSORT-ABS	-0.346137	0.0416648	0.16356
CHOL (n=36)	NK cell resting_CIBERSORT	0.187534	0.280686	0.540875
CHOL (n=36)	NK cell resting_CIBERSORT-ABS	0.172705	0.321143	0.585577
CHOL (n=36)	NK cell_EPIC	-0.500385	0.00220455	0.0185339
CHOL (n=36)	NK cell_MCPCOUNTER	-0.0685011	0.695797	0.852913
CHOL (n=36)	NK cell_QUANTISEQ	-0.00503175	0.977114	0.989614
CHOL (n=36)	NK cell_XCELL	0.177513	0.307646	0.570827
CHOL (n=36)	T cell CD4+ (non-regulatory)_QUANTISEQ	0.0411017	0.814652	0.916966
CHOL (n=36)	T cell CD4+ (non-regulatory)_XCELL	0.0430775	0.805908	0.913227
CHOL (n=36)	T cell CD4+ central memory_XCELL	-0.147919	0.396439	0.645667
CHOL (n=36)	T cell CD4+ effector memory_XCELL	-0.242864	0.159792	0.399619
CHOL (n=36)	T cell CD4+ memory activated_CIBERSORT	0.0216004	0.901978	0.958896
CHOL (n=36)	T cell CD4+ memory activated_CIBERSORT-ABS	0.0216004	0.901978	0.958896
CHOL (n=36)	T cell CD4+ memory resting_CIBERSORT	-0.141255	0.418286	0.655682
CHOL (n=36)	T cell CD4+ memory resting_CIBERSORT-ABS	-0.135327	0.438278	0.669034
CHOL (n=36)	T cell CD4+ memory_XCELL	0.0123088	0.944052	0.979735
CHOL (n=36)	T cell CD4+ naive_CIBERSORT	-0.0818888	0.640033	0.820555
CHOL (n=36)	T cell CD4+ naive_CIBERSORT-ABS	-0.0818888	0.640033	0.820555
CHOL (n=36)	T cell CD4+ naive_XCELL	0.117025	0.503182	0.726581
CHOL (n=36)	T cell CD4+ Th1_XCELL	-0.185674	0.285569	0.546957
CHOL (n=36)	T cell CD4+ Th2_XCELL	0.312186	0.0678843	0.228688
CHOL (n=36)	T cell CD4+_EPIC	-0.00819145	0.962751	0.983681
CHOL (n=36)	T cell CD4+_TIMER	0.00922276	0.958065	0.9828
COAD (n=458)	NK cell activated_CIBERSORT	0.0426148	0.481565	0.711488
COAD (n=458)	NK cell activated_CIBERSORT-ABS	0.0513344	0.396457	0.645667
COAD (n=458)	NK cell resting_CIBERSORT	-0.0577885	0.339705	0.605479
COAD (n=458)	NK cell resting_CIBERSORT-ABS	-0.0227737	0.706926	0.859898
COAD (n=458)	NK cell_EPIC	-0.0547275	0.365944	0.627521
COAD (n=458)	NK cell_MCPCOUNTER	0.137128	0.022942	0.105289
COAD (n=458)	NK cell_QUANTISEQ	0.233315	9.40291e-05	0.00146439
COAD (n=458)	NK cell_XCELL	0.0123007	0.839087	0.933852
COAD (n=458)	T cell CD4+ (non-regulatory)_QUANTISEQ	-0.0274547	0.650335	0.828874
COAD (n=458)	T cell CD4+ (non-regulatory)_XCELL	-0.0551695	0.36208	0.623144
COAD (n=458)	T cell CD4+ central memory_XCELL	0.0348582	0.564886	0.768828
COAD (n=458)	T cell CD4+ effector memory_XCELL	-0.060538	0.317187	0.581714
COAD (n=458)	T cell CD4+ memory activated_CIBERSORT	-0.03002	0.620128	0.810165
COAD (n=458)	T cell CD4+ memory activated_CIBERSORT-ABS	-0.0198441	0.743206	0.883651
COAD (n=458)	T cell CD4+ memory resting_CIBERSORT	0.00274467	0.963862	0.983681
COAD (n=458)	T cell CD4+ memory resting_CIBERSORT-ABS	0.0682356	0.259438	0.521453
COAD (n=458)	T cell CD4+ memory_XCELL	-0.0735433	0.224111	0.479516
COAD (n=458)	T cell CD4+ naive_CIBERSORT	-0.0560764	0.35423	0.61666
COAD (n=458)	T cell CD4+ naive_CIBERSORT-ABS	-0.0564547	0.350988	0.6152
COAD (n=458)	T cell CD4+ naive_XCELL	-0.0116684	0.847253	0.936968
COAD (n=458)	T cell CD4+ Th1_XCELL	0.296548	5.48849e-07	2.17253e-05
COAD (n=458)	T cell CD4+ Th2_XCELL	0.165331	0.00599312	0.038731
COAD (n=458)	T cell CD4+_EPIC	0.12101	0.0449684	0.171898
COAD (n=458)	T cell CD4+_TIMER	0.117676	0.0512562	0.188734
DLBC (n=48)	NK cell activated_CIBERSORT	-0.0904766	0.573726	0.77453
DLBC (n=48)	NK cell activated_CIBERSORT-ABS	0.112127	0.485197	0.712461
DLBC (n=48)	NK cell resting_CIBERSORT	0.44853	0.00326947	0.0250483
DLBC (n=48)	NK cell resting_CIBERSORT-ABS	0.449822	0.00317053	0.0246419
DLBC (n=48)	NK cell_EPIC	0.252875	0.110675	0.317739
DLBC (n=48)	NK cell_MCPCOUNTER	0.291689	0.0642515	0.219437
DLBC (n=48)	NK cell_QUANTISEQ	-0.156497	0.328509	0.592189
DLBC (n=48)	NK cell_XCELL	0.255326	0.107146	0.311281
DLBC (n=48)	T cell CD4+ (non-regulatory)_QUANTISEQ	-0.130812	0.414951	0.653379
DLBC (n=48)	T cell CD4+ (non-regulatory)_XCELL	-0.221602	0.163788	0.404153
DLBC (n=48)	T cell CD4+ central memory_XCELL	-0.542446	0.000248546	0.0032345
DLBC (n=48)	T cell CD4+ effector memory_XCELL	-0.131574	0.412213	0.653379
DLBC (n=48)	T cell CD4+ memory activated_CIBERSORT	0.347365	0.0260654	0.116254
DLBC (n=48)	T cell CD4+ memory activated_CIBERSORT-ABS	0.386915	0.0124534	0.0664645
DLBC (n=48)	T cell CD4+ memory resting_CIBERSORT	-0.00131088	0.99351	0.996748
DLBC (n=48)	T cell CD4+ memory resting_CIBERSORT-ABS	-0.0094407	0.953285	0.982779
DLBC (n=48)	T cell CD4+ memory_XCELL	0.185128	0.246542	0.507647
DLBC (n=48)	T cell CD4+ naive_CIBERSORT	-0.157898	0.324145	0.588792
DLBC (n=48)	T cell CD4+ naive_CIBERSORT-ABS	-0.148417	0.3544	0.61666
DLBC (n=48)	T cell CD4+ naive_XCELL	0.0937913	0.55971	0.766365
DLBC (n=48)	T cell CD4+ Th1_XCELL	0.0852268	0.596246	0.791108
DLBC (n=48)	T cell CD4+ Th2_XCELL	0.502195	0.000820921	0.0084769
DLBC (n=48)	T cell CD4+_EPIC	-0.084794	0.59812	0.792488
DLBC (n=48)	T cell CD4+_TIMER	-0.238933	0.132454	0.361585
ESCA (n=185)	NK cell activated_CIBERSORT	-0.0449373	0.549173	0.760517
ESCA (n=185)	NK cell activated_CIBERSORT-ABS	-0.134975	0.0708348	0.234075
ESCA (n=185)	NK cell resting_CIBERSORT	0.0781173	0.297252	0.560296
ESCA (n=185)	NK cell resting_CIBERSORT-ABS	0.0895706	0.231794	0.490434
ESCA (n=185)	NK cell_EPIC	-0.155001	0.0377421	0.155221
ESCA (n=185)	NK cell_MCPCOUNTER	-0.136676	0.0673223	0.227602
ESCA (n=185)	NK cell_QUANTISEQ	0.0306747	0.682706	0.842278
ESCA (n=185)	NK cell_XCELL	0.0290906	0.698272	0.85472
ESCA (n=185)	T cell CD4+ (non-regulatory)_QUANTISEQ	0.107196	0.152058	0.39042
ESCA (n=185)	T cell CD4+ (non-regulatory)_XCELL	-0.0154318	0.837096	0.933382
ESCA (n=185)	T cell CD4+ central memory_XCELL	-0.0243786	0.7453	0.883651
ESCA (n=185)	T cell CD4+ effector memory_XCELL	-0.227328	0.00214803	0.0183841
ESCA (n=185)	T cell CD4+ memory activated_CIBERSORT	-0.13846	0.0637927	0.218784
ESCA (n=185)	T cell CD4+ memory activated_CIBERSORT-ABS	-0.143324	0.0549307	0.197667
ESCA (n=185)	T cell CD4+ memory resting_CIBERSORT	0.110222	0.14076	0.372433
ESCA (n=185)	T cell CD4+ memory resting_CIBERSORT-ABS	-0.0211472	0.778117	0.901477
ESCA (n=185)	T cell CD4+ memory_XCELL	-0.0585731	0.434781	0.66859
ESCA (n=185)	T cell CD4+ naive_CIBERSORT	0.103382	0.16726	0.405349
ESCA (n=185)	T cell CD4+ naive_CIBERSORT-ABS	0.103382	0.16726	0.405349
ESCA (n=185)	T cell CD4+ naive_XCELL	-0.262392	0.000373144	0.0046643
ESCA (n=185)	T cell CD4+ Th1_XCELL	-0.00869929	0.90773	0.961786
ESCA (n=185)	T cell CD4+ Th2_XCELL	0.215221	0.00371434	0.0271432
ESCA (n=185)	T cell CD4+_EPIC	0.0903297	0.227847	0.485324
ESCA (n=185)	T cell CD4+_TIMER	-0.0617801	0.410007	0.653379
GBM (n=153)	NK cell activated_CIBERSORT	-0.052129	0.545196	0.757216
GBM (n=153)	NK cell activated_CIBERSORT-ABS	-0.0476644	0.580194	0.777411
GBM (n=153)	NK cell resting_CIBERSORT	-0.0356881	0.678857	0.842278
GBM (n=153)	NK cell resting_CIBERSORT-ABS	-0.0458193	0.594957	0.790502
GBM (n=153)	NK cell_EPIC	-0.353542	2.25643e-05	0.000476357
GBM (n=153)	NK cell_MCPCOUNTER	0.194808	0.0225381	0.104445
GBM (n=153)	NK cell_QUANTISEQ	0.351833	2.48711e-05	0.000513642
GBM (n=153)	NK cell_XCELL	-0.167748	0.0500713	0.185938
GBM (n=153)	T cell CD4+ (non-regulatory)_QUANTISEQ	0.091068	0.289892	0.548601
GBM (n=153)	T cell CD4+ (non-regulatory)_XCELL	-0.138769	0.105836	0.308417
GBM (n=153)	T cell CD4+ central memory_XCELL	0.19894	0.0197774	0.0943479
GBM (n=153)	T cell CD4+ effector memory_XCELL	-0.110008	0.200648	0.44946
GBM (n=153)	T cell CD4+ memory activated_CIBERSORT	-0.114281	0.183607	0.427516
GBM (n=153)	T cell CD4+ memory activated_CIBERSORT-ABS	-0.113336	0.187283	0.433949
GBM (n=153)	T cell CD4+ memory resting_CIBERSORT	-0.158144	0.0649363	0.220319
GBM (n=153)	T cell CD4+ memory resting_CIBERSORT-ABS	-0.132636	0.122327	0.341797
GBM (n=153)	T cell CD4+ memory_XCELL	-0.35383	2.21959e-05	0.000476357
GBM (n=153)	T cell CD4+ naive_CIBERSORT	0.0941453	0.273833	0.53816
GBM (n=153)	T cell CD4+ naive_CIBERSORT-ABS	0.0934475	0.277421	0.53816
GBM (n=153)	T cell CD4+ naive_XCELL	0.120021	0.162416	0.402859
GBM (n=153)	T cell CD4+ Th1_XCELL	0.293217	0.000506434	0.00609003
GBM (n=153)	T cell CD4+ Th2_XCELL	-0.261274	0.00204328	0.0176465
GBM (n=153)	T cell CD4+_EPIC	0.473977	4.90721e-09	3.12522e-07
GBM (n=153)	T cell CD4+_TIMER	0.226885	0.00767247	0.0467741
HNSC (n=522)	NK cell activated_CIBERSORT	-0.190547	2.09206e-05	0.0004622
HNSC (n=522)	NK cell activated_CIBERSORT-ABS	-0.166243	0.000212327	0.00288157
HNSC (n=522)	NK cell resting_CIBERSORT	0.126179	0.00506499	0.0343696
HNSC (n=522)	NK cell resting_CIBERSORT-ABS	0.139583	0.00191296	0.0166726
HNSC (n=522)	NK cell_EPIC	-0.279323	2.8657e-10	2.58854e-08
HNSC (n=522)	NK cell_MCPCOUNTER	-0.0125702	0.780918	0.902521
HNSC (n=522)	NK cell_QUANTISEQ	-0.0509578	0.259254	0.521453
HNSC (n=522)	NK cell_XCELL	-0.0208244	0.644954	0.82353
HNSC (n=522)	T cell CD4+ (non-regulatory)_QUANTISEQ	0.149185	0.000902531	0.0087544
HNSC (n=522)	T cell CD4+ (non-regulatory)_XCELL	0.00162639	0.971296	0.984771
HNSC (n=522)	T cell CD4+ central memory_XCELL	-0.0717238	0.11208	0.319749
HNSC (n=522)	T cell CD4+ effector memory_XCELL	-0.0161998	0.720015	0.869141
HNSC (n=522)	T cell CD4+ memory activated_CIBERSORT	-0.0306906	0.497025	0.720876
HNSC (n=522)	T cell CD4+ memory activated_CIBERSORT-ABS	-0.0297276	0.51063	0.731672
HNSC (n=522)	T cell CD4+ memory resting_CIBERSORT	0.148926	0.000921563	0.00884328
HNSC (n=522)	T cell CD4+ memory resting_CIBERSORT-ABS	0.120053	0.0076808	0.0467741
HNSC (n=522)	T cell CD4+ memory_XCELL	0.101701	0.0240736	0.108905
HNSC (n=522)	T cell CD4+ naive_CIBERSORT	-0.0275014	0.542807	0.756109
HNSC (n=522)	T cell CD4+ naive_CIBERSORT-ABS	-0.0284291	0.529276	0.747775
HNSC (n=522)	T cell CD4+ naive_XCELL	-0.165747	0.000221919	0.00296933
HNSC (n=522)	T cell CD4+ Th1_XCELL	-0.223603	5.42261e-07	2.17253e-05
HNSC (n=522)	T cell CD4+ Th2_XCELL	0.0930297	0.0391389	0.15724
HNSC (n=522)	T cell CD4+_EPIC	0.230607	2.31644e-07	1.04791e-05
HNSC (n=522)	T cell CD4+_TIMER	0.0524065	0.245938	0.507647
HNSC-HPV- (n=422)	NK cell activated_CIBERSORT	-0.207146	2.97563e-05	0.000598567
HNSC-HPV- (n=422)	NK cell activated_CIBERSORT-ABS	-0.155948	0.00175784	0.015607
HNSC-HPV- (n=422)	NK cell resting_CIBERSORT	0.125562	0.0119593	0.0641882
HNSC-HPV- (n=422)	NK cell resting_CIBERSORT-ABS	0.15575	0.00178207	0.0156757
HNSC-HPV- (n=422)	NK cell_EPIC	-0.308211	2.99726e-10	2.58854e-08
HNSC-HPV- (n=422)	NK cell_MCPCOUNTER	0.065319	0.192341	0.441388
HNSC-HPV- (n=422)	NK cell_QUANTISEQ	0.00213302	0.966079	0.983681
HNSC-HPV- (n=422)	NK cell_XCELL	-0.0364481	0.467273	0.702388
HNSC-HPV- (n=422)	T cell CD4+ (non-regulatory)_QUANTISEQ	0.0979408	0.0503011	0.185938
HNSC-HPV- (n=422)	T cell CD4+ (non-regulatory)_XCELL	0.0323115	0.519332	0.740294
HNSC-HPV- (n=422)	T cell CD4+ central memory_XCELL	-0.111847	0.0252893	0.113325
HNSC-HPV- (n=422)	T cell CD4+ effector memory_XCELL	-0.0460041	0.358782	0.620843
HNSC-HPV- (n=422)	T cell CD4+ memory activated_CIBERSORT	-0.0138279	0.782774	0.903567
HNSC-HPV- (n=422)	T cell CD4+ memory activated_CIBERSORT-ABS	-0.0075323	0.880625	0.953927
HNSC-HPV- (n=422)	T cell CD4+ memory resting_CIBERSORT	0.169762	0.000651078	0.00719215
HNSC-HPV- (n=422)	T cell CD4+ memory resting_CIBERSORT-ABS	0.17202	0.000549428	0.00644391
HNSC-HPV- (n=422)	T cell CD4+ memory_XCELL	0.146088	0.00340777	0.0256935
HNSC-HPV- (n=422)	T cell CD4+ naive_CIBERSORT	-0.0427675	0.393624	0.645667
HNSC-HPV- (n=422)	T cell CD4+ naive_CIBERSORT-ABS	-0.0433155	0.387585	0.64008
HNSC-HPV- (n=422)	T cell CD4+ naive_XCELL	-0.10441	0.0368537	0.154916
HNSC-HPV- (n=422)	T cell CD4+ Th1_XCELL	-0.231566	2.86038e-06	7.99224e-05
HNSC-HPV- (n=422)	T cell CD4+ Th2_XCELL	0.119505	0.0167939	0.0830946
HNSC-HPV- (n=422)	T cell CD4+_EPIC	0.239238	1.29671e-06	4.10626e-05
HNSC-HPV- (n=422)	T cell CD4+_TIMER	0.130287	0.00908813	0.0532946
HNSC-HPV+ (n=98)	NK cell activated_CIBERSORT	-0.109609	0.306538	0.569885
HNSC-HPV+ (n=98)	NK cell activated_CIBERSORT-ABS	-0.158148	0.138818	0.372432
HNSC-HPV+ (n=98)	NK cell resting_CIBERSORT	0.143709	0.179089	0.420084
HNSC-HPV+ (n=98)	NK cell resting_CIBERSORT-ABS	0.0929528	0.386273	0.64008
HNSC-HPV+ (n=98)	NK cell_EPIC	-0.221189	0.0372444	0.155075
HNSC-HPV+ (n=98)	NK cell_MCPCOUNTER	-0.234271	0.0271248	0.120414
HNSC-HPV+ (n=98)	NK cell_QUANTISEQ	-0.175164	0.10062	0.297784
HNSC-HPV+ (n=98)	NK cell_XCELL	0.0155083	0.885307	0.956743
HNSC-HPV+ (n=98)	T cell CD4+ (non-regulatory)_QUANTISEQ	0.232181	0.0285651	0.125054
HNSC-HPV+ (n=98)	T cell CD4+ (non-regulatory)_XCELL	-0.118479	0.268803	0.533116
HNSC-HPV+ (n=98)	T cell CD4+ central memory_XCELL	-0.0766017	0.475541	0.708094
HNSC-HPV+ (n=98)	T cell CD4+ effector memory_XCELL	0.106666	0.319786	0.584578
HNSC-HPV+ (n=98)	T cell CD4+ memory activated_CIBERSORT	-0.0390003	0.716706	0.868457
HNSC-HPV+ (n=98)	T cell CD4+ memory activated_CIBERSORT-ABS	-0.0655597	0.541595	0.755529
HNSC-HPV+ (n=98)	T cell CD4+ memory resting_CIBERSORT	0.0825464	0.441866	0.670564
HNSC-HPV+ (n=98)	T cell CD4+ memory resting_CIBERSORT-ABS	-0.0359664	0.737913	0.878925
HNSC-HPV+ (n=98)	T cell CD4+ memory_XCELL	0.0305492	0.776263	0.901477
HNSC-HPV+ (n=98)	T cell CD4+ naive_CIBERSORT	-0.0279777	0.794663	0.90804
HNSC-HPV+ (n=98)	T cell CD4+ naive_CIBERSORT-ABS	-0.0306714	0.775391	0.901477
HNSC-HPV+ (n=98)	T cell CD4+ naive_XCELL	-0.346492	0.000880183	0.00875143
HNSC-HPV+ (n=98)	T cell CD4+ Th1_XCELL	-0.15675	0.142389	0.372433
HNSC-HPV+ (n=98)	T cell CD4+ Th2_XCELL	0.0686186	0.522856	0.742471
HNSC-HPV+ (n=98)	T cell CD4+_EPIC	0.162603	0.127894	0.35285
HNSC-HPV+ (n=98)	T cell CD4+_TIMER	-0.221034	0.0373812	0.155075
KICH (n=66)	NK cell activated_CIBERSORT	-0.133765	0.288098	0.547386
KICH (n=66)	NK cell activated_CIBERSORT-ABS	0.115255	0.360591	0.622022
KICH (n=66)	NK cell resting_CIBERSORT	-0.0269092	0.8315	0.929324
KICH (n=66)	NK cell resting_CIBERSORT-ABS	0.00260836	0.983548	0.992687
KICH (n=66)	NK cell_EPIC	0.00970725	0.938826	0.976873
KICH (n=66)	NK cell_MCPCOUNTER	0.20572	0.100171	0.297382
KICH (n=66)	NK cell_QUANTISEQ	0.334957	0.00638388	0.0407026
KICH (n=66)	NK cell_XCELL	0.0936859	0.457906	0.690493
KICH (n=66)	T cell CD4+ (non-regulatory)_QUANTISEQ	-0.0338719	0.788806	0.906148
KICH (n=66)	T cell CD4+ (non-regulatory)_XCELL	-0.184501	0.141212	0.372433
KICH (n=66)	T cell CD4+ central memory_XCELL	-0.130233	0.30113	0.563137
KICH (n=66)	T cell CD4+ effector memory_XCELL	0.116735	0.354417	0.61666
KICH (n=66)	T cell CD4+ memory activated_CIBERSORT	NA	NA	NA
KICH (n=66)	T cell CD4+ memory activated_CIBERSORT-ABS	NA	NA	NA
KICH (n=66)	T cell CD4+ memory resting_CIBERSORT	0.0232525	0.854127	0.942104
KICH (n=66)	T cell CD4+ memory resting_CIBERSORT-ABS	0.176852	0.158748	0.39897
KICH (n=66)	T cell CD4+ memory_XCELL	0.10745	0.394243	0.645667
KICH (n=66)	T cell CD4+ naive_CIBERSORT	-0.019578	0.876983	0.952153
KICH (n=66)	T cell CD4+ naive_CIBERSORT-ABS	-0.019578	0.876983	0.952153
KICH (n=66)	T cell CD4+ naive_XCELL	0.0305337	0.809206	0.914085
KICH (n=66)	T cell CD4+ Th1_XCELL	-0.147741	0.240205	0.505975
KICH (n=66)	T cell CD4+ Th2_XCELL	0.313759	0.0109232	0.0606121
KICH (n=66)	T cell CD4+_EPIC	-0.0199447	0.874697	0.952153
KICH (n=66)	T cell CD4+_TIMER	0.0951326	0.450961	0.681102
KIRC (n=533)	NK cell activated_CIBERSORT	-0.0784852	0.0923421	0.282663
KIRC (n=533)	NK cell activated_CIBERSORT-ABS	0.0420683	0.367486	0.629031
KIRC (n=533)	NK cell resting_CIBERSORT	-0.00404361	0.931002	0.972994
KIRC (n=533)	NK cell resting_CIBERSORT-ABS	0.0105109	0.821924	0.920787
KIRC (n=533)	NK cell_EPIC	-0.111109	0.0170079	0.0837177
KIRC (n=533)	NK cell_MCPCOUNTER	-0.100236	0.0314176	0.135667
KIRC (n=533)	NK cell_QUANTISEQ	0.0829462	0.0752133	0.244701
KIRC (n=533)	NK cell_XCELL	-0.0293009	0.530302	0.747775
KIRC (n=533)	T cell CD4+ (non-regulatory)_QUANTISEQ	0.0190028	0.684054	0.842278
KIRC (n=533)	T cell CD4+ (non-regulatory)_XCELL	-0.0163832	0.725715	0.869394
KIRC (n=533)	T cell CD4+ central memory_XCELL	0.0263167	0.573022	0.77453
KIRC (n=533)	T cell CD4+ effector memory_XCELL	-0.145462	0.00173974	0.015592
KIRC (n=533)	T cell CD4+ memory activated_CIBERSORT	0.0327194	0.48343	0.712029
KIRC (n=533)	T cell CD4+ memory activated_CIBERSORT-ABS	0.0337066	0.470324	0.705857
KIRC (n=533)	T cell CD4+ memory resting_CIBERSORT	-0.000749544	0.987195	0.994523
KIRC (n=533)	T cell CD4+ memory resting_CIBERSORT-ABS	0.0937156	0.0443122	0.171228
KIRC (n=533)	T cell CD4+ memory_XCELL	-0.0363953	0.435639	0.66859
KIRC (n=533)	T cell CD4+ naive_CIBERSORT	-0.0261706	0.575155	0.77453
KIRC (n=533)	T cell CD4+ naive_CIBERSORT-ABS	-0.0261706	0.575155	0.77453
KIRC (n=533)	T cell CD4+ naive_XCELL	0.0694951	0.136258	0.369842
KIRC (n=533)	T cell CD4+ Th1_XCELL	-0.118445	0.0109221	0.0606121
KIRC (n=533)	T cell CD4+ Th2_XCELL	0.0150295	0.747574	0.883651
KIRC (n=533)	T cell CD4+_EPIC	0.192153	3.27764e-05	0.00063546
KIRC (n=533)	T cell CD4+_TIMER	0.204561	9.55182e-06	0.000232672
KIRP (n=290)	NK cell activated_CIBERSORT	0.0506818	0.417573	0.655682
KIRP (n=290)	NK cell activated_CIBERSORT-ABS	0.0571274	0.360773	0.622022
KIRP (n=290)	NK cell resting_CIBERSORT	-0.0959153	0.124369	0.344462
KIRP (n=290)	NK cell resting_CIBERSORT-ABS	-0.0976069	0.117836	0.331196
KIRP (n=290)	NK cell_EPIC	-0.254263	3.59073e-05	0.000668861
KIRP (n=290)	NK cell_MCPCOUNTER	-0.158787	0.0106388	0.0606121
KIRP (n=290)	NK cell_QUANTISEQ	-0.122842	0.0487215	0.182946
KIRP (n=290)	NK cell_XCELL	-0.00321573	0.959006	0.9828
KIRP (n=290)	T cell CD4+ (non-regulatory)_QUANTISEQ	-0.0792877	0.204311	0.453495
KIRP (n=290)	T cell CD4+ (non-regulatory)_XCELL	0.126092	0.0430124	0.168155
KIRP (n=290)	T cell CD4+ central memory_XCELL	-0.125353	0.0442586	0.171228
KIRP (n=290)	T cell CD4+ effector memory_XCELL	-0.245196	6.88471e-05	0.0012112
KIRP (n=290)	T cell CD4+ memory activated_CIBERSORT	0.0208999	0.738297	0.878925
KIRP (n=290)	T cell CD4+ memory activated_CIBERSORT-ABS	0.0208999	0.738297	0.878925
KIRP (n=290)	T cell CD4+ memory resting_CIBERSORT	-0.0578074	0.355076	0.616676
KIRP (n=290)	T cell CD4+ memory resting_CIBERSORT-ABS	-0.0583079	0.350918	0.6152
KIRP (n=290)	T cell CD4+ memory_XCELL	0.144798	0.0199767	0.0943479
KIRP (n=290)	T cell CD4+ naive_CIBERSORT	NA	NA	NA
KIRP (n=290)	T cell CD4+ naive_CIBERSORT-ABS	NA	NA	NA
KIRP (n=290)	T cell CD4+ naive_XCELL	-0.0730798	0.242122	0.507647
KIRP (n=290)	T cell CD4+ Th1_XCELL	-0.103684	0.0965507	0.291663
KIRP (n=290)	T cell CD4+ Th2_XCELL	0.231887	0.000171328	0.00235886
KIRP (n=290)	T cell CD4+_EPIC	0.181239	0.0034866	0.0260656
KIRP (n=290)	T cell CD4+_TIMER	-0.00618162	0.921289	0.96966
LGG (n=516)	NK cell activated_CIBERSORT	0.0399894	0.383014	0.64008
LGG (n=516)	NK cell activated_CIBERSORT-ABS	-0.0623657	0.173428	0.412914
LGG (n=516)	NK cell resting_CIBERSORT	-0.137361	0.00261612	0.0214251
LGG (n=516)	NK cell resting_CIBERSORT-ABS	-0.153423	0.000764122	0.00806573
LGG (n=516)	NK cell_EPIC	-0.295819	4.14288e-11	4.91967e-09
LGG (n=516)	NK cell_MCPCOUNTER	-0.0589251	0.19843	0.445648
LGG (n=516)	NK cell_QUANTISEQ	0.379905	7.36432e-18	1.74903e-15
LGG (n=516)	NK cell_XCELL	0.0920209	0.0443389	0.171228
LGG (n=516)	T cell CD4+ (non-regulatory)_QUANTISEQ	0.0327974	0.47438	0.708094
LGG (n=516)	T cell CD4+ (non-regulatory)_XCELL	-0.0155198	0.735028	0.878336
LGG (n=516)	T cell CD4+ central memory_XCELL	0.153869	0.000737132	0.00786826
LGG (n=516)	T cell CD4+ effector memory_XCELL	-0.151866	0.000865567	0.00874775
LGG (n=516)	T cell CD4+ memory activated_CIBERSORT	-0.127224	0.00534354	0.0355641
LGG (n=516)	T cell CD4+ memory activated_CIBERSORT-ABS	-0.127197	0.00535334	0.0355641
LGG (n=516)	T cell CD4+ memory resting_CIBERSORT	-0.347863	4.82473e-15	7.63915e-13
LGG (n=516)	T cell CD4+ memory resting_CIBERSORT-ABS	-0.396946	1.72592e-19	8.19812e-17
LGG (n=516)	T cell CD4+ memory_XCELL	-0.0636873	0.164476	0.404671
LGG (n=516)	T cell CD4+ naive_CIBERSORT	0.279129	5.28004e-10	4.18003e-08
LGG (n=516)	T cell CD4+ naive_CIBERSORT-ABS	0.272296	1.42695e-09	1.04277e-07
LGG (n=516)	T cell CD4+ naive_XCELL	0.0499561	0.275704	0.53816
LGG (n=516)	T cell CD4+ Th1_XCELL	0.0233179	0.611075	0.802934
LGG (n=516)	T cell CD4+ Th2_XCELL	-0.220727	1.09699e-06	3.59359e-05
LGG (n=516)	T cell CD4+_EPIC	0.482635	2.92511e-29	2.77886e-26
LGG (n=516)	T cell CD4+_TIMER	-0.370859	4.94847e-17	9.40209e-15
LIHC (n=371)	NK cell activated_CIBERSORT	-0.137649	0.0104786	0.0603311
LIHC (n=371)	NK cell activated_CIBERSORT-ABS	-0.0860261	0.110707	0.317739
LIHC (n=371)	NK cell resting_CIBERSORT	0.11687	0.0299823	0.130657
LIHC (n=371)	NK cell resting_CIBERSORT-ABS	0.118598	0.0276194	0.122039
LIHC (n=371)	NK cell_EPIC	0.0203831	0.705978	0.859845
LIHC (n=371)	NK cell_MCPCOUNTER	-0.133611	0.0129971	0.068596
LIHC (n=371)	NK cell_QUANTISEQ	-0.0225436	0.676487	0.842278
LIHC (n=371)	NK cell_XCELL	-0.0199666	0.711714	0.864614
LIHC (n=371)	T cell CD4+ (non-regulatory)_QUANTISEQ	-0.14899	0.00555725	0.0366624
LIHC (n=371)	T cell CD4+ (non-regulatory)_XCELL	0.00204252	0.969847	0.984479
LIHC (n=371)	T cell CD4+ central memory_XCELL	-0.00364832	0.946169	0.979735
LIHC (n=371)	T cell CD4+ effector memory_XCELL	-0.136103	0.0113866	0.0625277
LIHC (n=371)	T cell CD4+ memory activated_CIBERSORT	0.0847469	0.116132	0.327374
LIHC (n=371)	T cell CD4+ memory activated_CIBERSORT-ABS	0.0831013	0.123414	0.342816
LIHC (n=371)	T cell CD4+ memory resting_CIBERSORT	-0.147816	0.00594649	0.0386929
LIHC (n=371)	T cell CD4+ memory resting_CIBERSORT-ABS	-0.106094	0.0489509	0.183084
LIHC (n=371)	T cell CD4+ memory_XCELL	0.035737	0.508236	0.731552
LIHC (n=371)	T cell CD4+ naive_CIBERSORT	-0.00256252	0.962175	0.983681
LIHC (n=371)	T cell CD4+ naive_CIBERSORT-ABS	-0.00286488	0.957716	0.9828
LIHC (n=371)	T cell CD4+ naive_XCELL	-0.141659	0.00841487	0.0502775
LIHC (n=371)	T cell CD4+ Th1_XCELL	-0.144646	0.00712192	0.0448068
LIHC (n=371)	T cell CD4+ Th2_XCELL	0.162338	0.002491	0.0207583
LIHC (n=371)	T cell CD4+_EPIC	0.0734102	0.173697	0.412914
LIHC (n=371)	T cell CD4+_TIMER	-0.141265	0.0086005	0.0507483
LUAD (n=515)	NK cell activated_CIBERSORT	0.0817763	0.0696532	0.232301
LUAD (n=515)	NK cell activated_CIBERSORT-ABS	0.010183	0.821565	0.920787
LUAD (n=515)	NK cell resting_CIBERSORT	0.092919	0.0391731	0.15724
LUAD (n=515)	NK cell resting_CIBERSORT-ABS	0.0925232	0.0400201	0.159076
LUAD (n=515)	NK cell_EPIC	0.00548107	0.903381	0.958896
LUAD (n=515)	NK cell_MCPCOUNTER	0.060636	0.178898	0.420084
LUAD (n=515)	NK cell_QUANTISEQ	0.0435718	0.334317	0.600381
LUAD (n=515)	NK cell_XCELL	0.0402671	0.372303	0.63385
LUAD (n=515)	T cell CD4+ (non-regulatory)_QUANTISEQ	0.10363	0.0213739	0.100026
LUAD (n=515)	T cell CD4+ (non-regulatory)_XCELL	-0.0836029	0.0636216	0.218784
LUAD (n=515)	T cell CD4+ central memory_XCELL	0.00514099	0.909349	0.961786
LUAD (n=515)	T cell CD4+ effector memory_XCELL	-0.114713	0.0108034	0.0606121
LUAD (n=515)	T cell CD4+ memory activated_CIBERSORT	-0.0236811	0.5999	0.792636
LUAD (n=515)	T cell CD4+ memory activated_CIBERSORT-ABS	-0.0213428	0.636399	0.818105
LUAD (n=515)	T cell CD4+ memory resting_CIBERSORT	-0.0833454	0.0644451	0.219437
LUAD (n=515)	T cell CD4+ memory resting_CIBERSORT-ABS	-0.10946	0.0150343	0.0767878
LUAD (n=515)	T cell CD4+ memory_XCELL	-0.149027	0.000903086	0.0087544
LUAD (n=515)	T cell CD4+ naive_CIBERSORT	0.0488808	0.27871	0.53816
LUAD (n=515)	T cell CD4+ naive_CIBERSORT-ABS	0.0488808	0.27871	0.53816
LUAD (n=515)	T cell CD4+ naive_XCELL	-0.0514588	0.254109	0.518033
LUAD (n=515)	T cell CD4+ Th1_XCELL	0.17931	6.23552e-05	0.00111769
LUAD (n=515)	T cell CD4+ Th2_XCELL	-0.0285232	0.527492	0.747775
LUAD (n=515)	T cell CD4+_EPIC	0.0342858	0.447518	0.678057
LUAD (n=515)	T cell CD4+_TIMER	0.0221683	0.623407	0.812396
LUSC (n=501)	NK cell activated_CIBERSORT	0.00794497	0.862598	0.946268
LUSC (n=501)	NK cell activated_CIBERSORT-ABS	0.0159229	0.728688	0.871856
LUSC (n=501)	NK cell resting_CIBERSORT	0.130384	0.00433967	0.0307663
LUSC (n=501)	NK cell resting_CIBERSORT-ABS	0.131606	0.00398543	0.0284674
LUSC (n=501)	NK cell_EPIC	-0.13427	0.00330216	0.0250964
LUSC (n=501)	NK cell_MCPCOUNTER	-0.0918102	0.0450553	0.171898
LUSC (n=501)	NK cell_QUANTISEQ	0.193508	2.08608e-05	0.0004622
LUSC (n=501)	NK cell_XCELL	-0.0863113	0.059614	0.207448
LUSC (n=501)	T cell CD4+ (non-regulatory)_QUANTISEQ	-0.0532987	0.245303	0.507647
LUSC (n=501)	T cell CD4+ (non-regulatory)_XCELL	0.0256958	0.575598	0.77453
LUSC (n=501)	T cell CD4+ central memory_XCELL	0.0141457	0.757967	0.893386
LUSC (n=501)	T cell CD4+ effector memory_XCELL	-0.0454009	0.322429	0.586796
LUSC (n=501)	T cell CD4+ memory activated_CIBERSORT	-0.18845	3.44032e-05	0.00065366
LUSC (n=501)	T cell CD4+ memory activated_CIBERSORT-ABS	-0.182638	6.01535e-05	0.00109896
LUSC (n=501)	T cell CD4+ memory resting_CIBERSORT	0.0937791	0.0406281	0.160152
LUSC (n=501)	T cell CD4+ memory resting_CIBERSORT-ABS	0.0980423	0.0322886	0.138797
LUSC (n=501)	T cell CD4+ memory_XCELL	-0.221152	1.07227e-06	3.59359e-05
LUSC (n=501)	T cell CD4+ naive_CIBERSORT	-0.0314183	0.493625	0.718138
LUSC (n=501)	T cell CD4+ naive_CIBERSORT-ABS	-0.0313185	0.495	0.719036
LUSC (n=501)	T cell CD4+ naive_XCELL	-0.0296651	0.518061	0.740087
LUSC (n=501)	T cell CD4+ Th1_XCELL	0.171341	0.000169794	0.00235886
LUSC (n=501)	T cell CD4+ Th2_XCELL	-0.122926	0.00719024	0.044939
LUSC (n=501)	T cell CD4+_EPIC	0.13596	0.00292571	0.0231618
LUSC (n=501)	T cell CD4+_TIMER	0.175479	0.000116967	0.00179223
MESO (n=87)	NK cell activated_CIBERSORT	0.00929007	0.932751	0.973737
MESO (n=87)	NK cell activated_CIBERSORT-ABS	0.0294623	0.788957	0.906148
MESO (n=87)	NK cell resting_CIBERSORT	-0.127176	0.246107	0.507647
MESO (n=87)	NK cell resting_CIBERSORT-ABS	-0.127486	0.244946	0.507647
MESO (n=87)	NK cell_EPIC	-0.245318	0.0236397	0.10797
MESO (n=87)	NK cell_MCPCOUNTER	-0.306031	0.0043944	0.0309235
MESO (n=87)	NK cell_QUANTISEQ	-0.0707804	0.519764	0.740294
MESO (n=87)	NK cell_XCELL	0.0973307	0.375529	0.637058
MESO (n=87)	T cell CD4+ (non-regulatory)_QUANTISEQ	-0.142357	0.193717	0.442383
MESO (n=87)	T cell CD4+ (non-regulatory)_XCELL	-0.149708	0.17146	0.411331
MESO (n=87)	T cell CD4+ central memory_XCELL	-0.0966429	0.378928	0.64008
MESO (n=87)	T cell CD4+ effector memory_XCELL	-0.255537	0.0182558	0.0884849
MESO (n=87)	T cell CD4+ memory activated_CIBERSORT	-0.189765	0.0819486	0.262125
MESO (n=87)	T cell CD4+ memory activated_CIBERSORT-ABS	-0.188517	0.0840169	0.266441
MESO (n=87)	T cell CD4+ memory resting_CIBERSORT	-0.119435	0.276272	0.53816
MESO (n=87)	T cell CD4+ memory resting_CIBERSORT-ABS	-0.0476863	0.664736	0.83976
MESO (n=87)	T cell CD4+ memory_XCELL	0.207599	0.0565913	0.200603
MESO (n=87)	T cell CD4+ naive_CIBERSORT	NA	NA	NA
MESO (n=87)	T cell CD4+ naive_CIBERSORT-ABS	NA	NA	NA
MESO (n=87)	T cell CD4+ naive_XCELL	-0.141576	0.196199	0.444948
MESO (n=87)	T cell CD4+ Th1_XCELL	-0.223456	0.0398089	0.158901
MESO (n=87)	T cell CD4+ Th2_XCELL	0.446017	1.88548e-05	0.000436881
MESO (n=87)	T cell CD4+_EPIC	0.0957054	0.383591	0.64008
MESO (n=87)	T cell CD4+_TIMER	-0.00120522	0.991266	0.99651
OV (n=303)	NK cell activated_CIBERSORT	-0.198587	0.00163657	0.0148071
OV (n=303)	NK cell activated_CIBERSORT-ABS	-0.168591	0.00767511	0.0467741
OV (n=303)	NK cell resting_CIBERSORT	0.183656	0.00363476	0.0267676
OV (n=303)	NK cell resting_CIBERSORT-ABS	0.186171	0.00319048	0.0246419
OV (n=303)	NK cell_EPIC	-0.0701151	0.27038	0.534014
OV (n=303)	NK cell_MCPCOUNTER	-0.0369093	0.562127	0.76727
OV (n=303)	NK cell_QUANTISEQ	0.203438	0.00124719	0.011731
OV (n=303)	NK cell_XCELL	-0.0243942	0.701679	0.856806
OV (n=303)	T cell CD4+ (non-regulatory)_QUANTISEQ	0.0035236	0.955882	0.982779
OV (n=303)	T cell CD4+ (non-regulatory)_XCELL	0.0281554	0.65839	0.836191
OV (n=303)	T cell CD4+ central memory_XCELL	0.0013693	0.982848	0.992687
OV (n=303)	T cell CD4+ effector memory_XCELL	-0.178408	0.00474655	0.0324404
OV (n=303)	T cell CD4+ memory activated_CIBERSORT	-0.0889432	0.161749	0.402255
OV (n=303)	T cell CD4+ memory activated_CIBERSORT-ABS	-0.0878695	0.166893	0.405349
OV (n=303)	T cell CD4+ memory resting_CIBERSORT	0.114567	0.0711227	0.234075
OV (n=303)	T cell CD4+ memory resting_CIBERSORT-ABS	0.108918	0.0863157	0.271523
OV (n=303)	T cell CD4+ memory_XCELL	-0.0532103	0.403148	0.650239
OV (n=303)	T cell CD4+ naive_CIBERSORT	-0.0261105	0.681796	0.842278
OV (n=303)	T cell CD4+ naive_CIBERSORT-ABS	-0.0261105	0.681796	0.842278
OV (n=303)	T cell CD4+ naive_XCELL	-0.103479	0.103307	0.302907
OV (n=303)	T cell CD4+ Th1_XCELL	-0.0189959	0.765498	0.896699
OV (n=303)	T cell CD4+ Th2_XCELL	0.132059	0.0372962	0.155075
OV (n=303)	T cell CD4+_EPIC	0.114855	0.0704118	0.233885
OV (n=303)	T cell CD4+_TIMER	0.202319	0.00132855	0.0123737
PAAD (n=179)	NK cell activated_CIBERSORT	0.125452	0.102063	0.300184
PAAD (n=179)	NK cell activated_CIBERSORT-ABS	0.126727	0.0986004	0.294561
PAAD (n=179)	NK cell resting_CIBERSORT	0.00333297	0.965491	0.983681
PAAD (n=179)	NK cell resting_CIBERSORT-ABS	0.00506265	0.947603	0.979735
PAAD (n=179)	NK cell_EPIC	-0.0319557	0.678203	0.842278
PAAD (n=179)	NK cell_MCPCOUNTER	0.01935	0.801658	0.913227
PAAD (n=179)	NK cell_QUANTISEQ	0.189288	0.0131541	0.0690409
PAAD (n=179)	NK cell_XCELL	0.0307096	0.690093	0.848109
PAAD (n=179)	T cell CD4+ (non-regulatory)_QUANTISEQ	-0.016407	0.831335	0.929324
PAAD (n=179)	T cell CD4+ (non-regulatory)_XCELL	-0.0181701	0.813524	0.916783
PAAD (n=179)	T cell CD4+ central memory_XCELL	0.128961	0.0927542	0.282663
PAAD (n=179)	T cell CD4+ effector memory_XCELL	0.0190188	0.804985	0.913227
PAAD (n=179)	T cell CD4+ memory activated_CIBERSORT	-0.0677578	0.378555	0.64008
PAAD (n=179)	T cell CD4+ memory activated_CIBERSORT-ABS	-0.0691687	0.368684	0.629945
PAAD (n=179)	T cell CD4+ memory resting_CIBERSORT	-0.0928133	0.227279	0.485203
PAAD (n=179)	T cell CD4+ memory resting_CIBERSORT-ABS	-0.100278	0.191901	0.441388
PAAD (n=179)	T cell CD4+ memory_XCELL	-0.126407	0.09946	0.296197
PAAD (n=179)	T cell CD4+ naive_CIBERSORT	0.0543618	0.480075	0.710392
PAAD (n=179)	T cell CD4+ naive_CIBERSORT-ABS	0.0543618	0.480075	0.710392
PAAD (n=179)	T cell CD4+ naive_XCELL	0.000882485	0.99086	0.99651
PAAD (n=179)	T cell CD4+ Th1_XCELL	0.174232	0.0226595	0.104498
PAAD (n=179)	T cell CD4+ Th2_XCELL	0.0370099	0.630814	0.81541
PAAD (n=179)	T cell CD4+_EPIC	0.0419355	0.586032	0.784127
PAAD (n=179)	T cell CD4+_TIMER	0.286717	0.000143562	0.00203558
PCPG (n=181)	NK cell activated_CIBERSORT	-0.02265	0.771402	0.901477
PCPG (n=181)	NK cell activated_CIBERSORT-ABS	0.196379	0.010974	0.0606121
PCPG (n=181)	NK cell resting_CIBERSORT	-0.115887	0.135864	0.369829
PCPG (n=181)	NK cell resting_CIBERSORT-ABS	-0.11821	0.12814	0.35285
PCPG (n=181)	NK cell_EPIC	-0.262618	0.000606571	0.00686003
PCPG (n=181)	NK cell_MCPCOUNTER	0.0222766	0.77507	0.901477
PCPG (n=181)	NK cell_QUANTISEQ	0.0791242	0.309427	0.571898
PCPG (n=181)	NK cell_XCELL	-0.0087981	0.910154	0.961786
PCPG (n=181)	T cell CD4+ (non-regulatory)_QUANTISEQ	0.244118	0.00147659	0.0134881
PCPG (n=181)	T cell CD4+ (non-regulatory)_XCELL	-0.0453777	0.560361	0.766365
PCPG (n=181)	T cell CD4+ central memory_XCELL	-0.132379	0.0881246	0.274486
PCPG (n=181)	T cell CD4+ effector memory_XCELL	0.0394772	0.612489	0.803472
PCPG (n=181)	T cell CD4+ memory activated_CIBERSORT	0.021994	0.777848	0.901477
PCPG (n=181)	T cell CD4+ memory activated_CIBERSORT-ABS	0.0207837	0.78978	0.906148
PCPG (n=181)	T cell CD4+ memory resting_CIBERSORT	0.162045	0.0364204	0.153775
PCPG (n=181)	T cell CD4+ memory resting_CIBERSORT-ABS	0.260745	0.000665718	0.00726934
PCPG (n=181)	T cell CD4+ memory_XCELL	-0.00647995	0.933763	0.973737
PCPG (n=181)	T cell CD4+ naive_CIBERSORT	-0.00431371	0.955878	0.982779
PCPG (n=181)	T cell CD4+ naive_CIBERSORT-ABS	-0.00431371	0.955878	0.982779
PCPG (n=181)	T cell CD4+ naive_XCELL	-0.0221	0.776806	0.901477
PCPG (n=181)	T cell CD4+ Th1_XCELL	-0.206576	0.00739632	0.0459249
PCPG (n=181)	T cell CD4+ Th2_XCELL	0.211169	0.00615583	0.0395138
PCPG (n=181)	T cell CD4+_EPIC	0.407511	4.60866e-08	2.57543e-06
PCPG (n=181)	T cell CD4+_TIMER	-0.181991	0.018579	0.0892319
PRAD (n=498)	NK cell activated_CIBERSORT	-0.0535114	0.27619	0.53816
PRAD (n=498)	NK cell activated_CIBERSORT-ABS	-0.0890259	0.0696903	0.232301
PRAD (n=498)	NK cell resting_CIBERSORT	-0.0209276	0.670397	0.842278
PRAD (n=498)	NK cell resting_CIBERSORT-ABS	-0.023442	0.633539	0.816271
PRAD (n=498)	NK cell_EPIC	-0.0815687	0.0966239	0.291663
PRAD (n=498)	NK cell_MCPCOUNTER	-0.170492	0.00047849	0.00587946
PRAD (n=498)	NK cell_QUANTISEQ	0.139075	0.00448495	0.0313287
PRAD (n=498)	NK cell_XCELL	-0.0533366	0.277763	0.53816
PRAD (n=498)	T cell CD4+ (non-regulatory)_QUANTISEQ	-0.178743	0.00024808	0.0032345
PRAD (n=498)	T cell CD4+ (non-regulatory)_XCELL	-0.09257	0.0592361	0.207137
PRAD (n=498)	T cell CD4+ central memory_XCELL	0.0132078	0.788246	0.906148
PRAD (n=498)	T cell CD4+ effector memory_XCELL	0.0258178	0.599524	0.792636
PRAD (n=498)	T cell CD4+ memory activated_CIBERSORT	0.0669816	0.172699	0.412914
PRAD (n=498)	T cell CD4+ memory activated_CIBERSORT-ABS	0.0667482	0.174203	0.412914
PRAD (n=498)	T cell CD4+ memory resting_CIBERSORT	-0.0416419	0.396916	0.645667
PRAD (n=498)	T cell CD4+ memory resting_CIBERSORT-ABS	-0.083013	0.0908435	0.281112
PRAD (n=498)	T cell CD4+ memory_XCELL	0.203008	3.02434e-05	0.000598567
PRAD (n=498)	T cell CD4+ naive_CIBERSORT	NA	NA	NA
PRAD (n=498)	T cell CD4+ naive_CIBERSORT-ABS	NA	NA	NA
PRAD (n=498)	T cell CD4+ naive_XCELL	-0.0292708	0.551615	0.761678
PRAD (n=498)	T cell CD4+ Th1_XCELL	-0.0381167	0.438119	0.669034
PRAD (n=498)	T cell CD4+ Th2_XCELL	0.0694985	0.157085	0.396892
PRAD (n=498)	T cell CD4+_EPIC	0.170379	0.000482734	0.00587946
PRAD (n=498)	T cell CD4+_TIMER	-0.142809	0.003512	0.0260656
READ (n=166)	NK cell activated_CIBERSORT	-0.102761	0.335144	0.600481
READ (n=166)	NK cell activated_CIBERSORT-ABS	-0.0423342	0.691971	0.849319
READ (n=166)	NK cell resting_CIBERSORT	0.178976	0.0914425	0.281134
READ (n=166)	NK cell resting_CIBERSORT-ABS	0.211997	0.044864	0.171898
READ (n=166)	NK cell_EPIC	-0.0375661	0.725194	0.869394
READ (n=166)	NK cell_MCPCOUNTER	0.0479589	0.653521	0.831117
READ (n=166)	NK cell_QUANTISEQ	0.0148773	0.889313	0.956743
READ (n=166)	NK cell_XCELL	-0.140801	0.185607	0.431115
READ (n=166)	T cell CD4+ (non-regulatory)_QUANTISEQ	0.10164	0.34047	0.605706
READ (n=166)	T cell CD4+ (non-regulatory)_XCELL	-0.120073	0.259629	0.521453
READ (n=166)	T cell CD4+ central memory_XCELL	0.0761757	0.475473	0.708094
READ (n=166)	T cell CD4+ effector memory_XCELL	-0.265418	0.0114617	0.0625783
READ (n=166)	T cell CD4+ memory activated_CIBERSORT	0.203518	0.0543622	0.196365
READ (n=166)	T cell CD4+ memory activated_CIBERSORT-ABS	0.185485	0.0800677	0.25714
READ (n=166)	T cell CD4+ memory resting_CIBERSORT	-0.0627721	0.556691	0.766365
READ (n=166)	T cell CD4+ memory resting_CIBERSORT-ABS	0.011437	0.914799	0.96455
READ (n=166)	T cell CD4+ memory_XCELL	-0.0344867	0.746928	0.883651
READ (n=166)	T cell CD4+ naive_CIBERSORT	-0.119241	0.262969	0.523868
READ (n=166)	T cell CD4+ naive_CIBERSORT-ABS	-0.119241	0.262969	0.523868
READ (n=166)	T cell CD4+ naive_XCELL	-0.217761	0.0392273	0.15724
READ (n=166)	T cell CD4+ Th1_XCELL	0.247664	0.0185978	0.0892319
READ (n=166)	T cell CD4+ Th2_XCELL	0.319094	0.00217356	0.0184364
READ (n=166)	T cell CD4+_EPIC	0.136931	0.198109	0.445648
READ (n=166)	T cell CD4+_TIMER	0.128088	0.228928	0.486537
SARC (n=260)	NK cell activated_CIBERSORT	-0.0888121	0.166696	0.405349
SARC (n=260)	NK cell activated_CIBERSORT-ABS	-0.163183	0.0106786	0.0606121
SARC (n=260)	NK cell resting_CIBERSORT	0.248105	8.96444e-05	0.00144343
SARC (n=260)	NK cell resting_CIBERSORT-ABS	0.249324	8.2534e-05	0.00139338
SARC (n=260)	NK cell_EPIC	-0.0771842	0.229651	0.486984
SARC (n=260)	NK cell_MCPCOUNTER	-0.28909	4.41235e-06	0.000119764
SARC (n=260)	NK cell_QUANTISEQ	0.0917511	0.153046	0.391664
SARC (n=260)	NK cell_XCELL	0.0947315	0.140085	0.372433
SARC (n=260)	T cell CD4+ (non-regulatory)_QUANTISEQ	-0.112254	0.0801195	0.25714
SARC (n=260)	T cell CD4+ (non-regulatory)_XCELL	0.0266102	0.679165	0.842278
SARC (n=260)	T cell CD4+ central memory_XCELL	0.0826673	0.198137	0.445648
SARC (n=260)	T cell CD4+ effector memory_XCELL	-0.307545	9.6536e-07	3.39664e-05
SARC (n=260)	T cell CD4+ memory activated_CIBERSORT	0.0941154	0.142693	0.372433
SARC (n=260)	T cell CD4+ memory activated_CIBERSORT-ABS	0.0898777	0.161645	0.402255
SARC (n=260)	T cell CD4+ memory resting_CIBERSORT	0.0299125	0.641965	0.820817
SARC (n=260)	T cell CD4+ memory resting_CIBERSORT-ABS	-0.135357	0.0345821	0.147986
SARC (n=260)	T cell CD4+ memory_XCELL	-0.030646	0.633818	0.816271
SARC (n=260)	T cell CD4+ naive_CIBERSORT	-0.0388316	0.546055	0.757303
SARC (n=260)	T cell CD4+ naive_CIBERSORT-ABS	-0.0399467	0.534579	0.749876
SARC (n=260)	T cell CD4+ naive_XCELL	-0.0515504	0.422761	0.657836
SARC (n=260)	T cell CD4+ Th1_XCELL	0.0524548	0.414658	0.653379
SARC (n=260)	T cell CD4+ Th2_XCELL	0.0541207	0.399974	0.647625
SARC (n=260)	T cell CD4+_EPIC	-0.0596041	0.35388	0.61666
SARC (n=260)	T cell CD4+_TIMER	-0.354567	1.22502e-08	7.27356e-07
SKCM (n=471)	NK cell activated_CIBERSORT	-0.0592517	0.206123	0.454882
SKCM (n=471)	NK cell activated_CIBERSORT-ABS	-0.0451395	0.335637	0.600481
SKCM (n=471)	NK cell resting_CIBERSORT	0.123953	0.00798294	0.0479987
SKCM (n=471)	NK cell resting_CIBERSORT-ABS	0.114276	0.0145149	0.0745361
SKCM (n=471)	NK cell_EPIC	0.0882888	0.0593066	0.207137
SKCM (n=471)	NK cell_MCPCOUNTER	-0.0959663	0.0403018	0.159528
SKCM (n=471)	NK cell_QUANTISEQ	-0.0674364	0.150061	0.387797
SKCM (n=471)	NK cell_XCELL	0.0309544	0.509205	0.731672
SKCM (n=471)	T cell CD4+ (non-regulatory)_QUANTISEQ	0.0572079	0.222232	0.478523
SKCM (n=471)	T cell CD4+ (non-regulatory)_XCELL	-0.0212244	0.650884	0.828874
SKCM (n=471)	T cell CD4+ central memory_XCELL	0.0685284	0.143556	0.373638
SKCM (n=471)	T cell CD4+ effector memory_XCELL	0.0279751	0.550829	0.761678
SKCM (n=471)	T cell CD4+ memory activated_CIBERSORT	0.00908391	0.846439	0.936968
SKCM (n=471)	T cell CD4+ memory activated_CIBERSORT-ABS	-0.0057787	0.901951	0.958896
SKCM (n=471)	T cell CD4+ memory resting_CIBERSORT	-0.0196445	0.675332	0.842278
SKCM (n=471)	T cell CD4+ memory resting_CIBERSORT-ABS	-0.0325864	0.487122	0.713044
SKCM (n=471)	T cell CD4+ memory_XCELL	-0.14068	0.00257698	0.0212881
SKCM (n=471)	T cell CD4+ naive_CIBERSORT	-0.0265848	0.570808	0.773563
SKCM (n=471)	T cell CD4+ naive_CIBERSORT-ABS	-0.0291274	0.534535	0.749876
SKCM (n=471)	T cell CD4+ naive_XCELL	-0.0850409	0.0693276	0.232301
SKCM (n=471)	T cell CD4+ Th1_XCELL	0.0821361	0.0794263	0.25714
SKCM (n=471)	T cell CD4+ Th2_XCELL	0.0275664	0.556667	0.766365
SKCM (n=471)	T cell CD4+_EPIC	0.0181314	0.699071	0.85472
SKCM (n=471)	T cell CD4+_TIMER	-0.087149	0.0626775	0.217312
SKCM-Metastasis (n=368)	NK cell activated_CIBERSORT	-0.0122964	0.817668	0.919271
SKCM-Metastasis (n=368)	NK cell activated_CIBERSORT-ABS	-0.0172586	0.746245	0.883651
SKCM-Metastasis (n=368)	NK cell resting_CIBERSORT	0.0855573	0.108053	0.312007
SKCM-Metastasis (n=368)	NK cell resting_CIBERSORT-ABS	0.0751612	0.158202	0.398652
SKCM-Metastasis (n=368)	NK cell_EPIC	0.0894623	0.0928325	0.282663
SKCM-Metastasis (n=368)	NK cell_MCPCOUNTER	-0.101612	0.056133	0.200603
SKCM-Metastasis (n=368)	NK cell_QUANTISEQ	-0.0523674	0.325865	0.589661
SKCM-Metastasis (n=368)	NK cell_XCELL	0.0403108	0.449609	0.680141
SKCM-Metastasis (n=368)	T cell CD4+ (non-regulatory)_QUANTISEQ	0.0413433	0.438074	0.669034
SKCM-Metastasis (n=368)	T cell CD4+ (non-regulatory)_XCELL	-0.0586312	0.271252	0.534625
SKCM-Metastasis (n=368)	T cell CD4+ central memory_XCELL	0.0557746	0.295332	0.557783
SKCM-Metastasis (n=368)	T cell CD4+ effector memory_XCELL	0.0648807	0.223342	0.47895
SKCM-Metastasis (n=368)	T cell CD4+ memory activated_CIBERSORT	-0.00975808	0.854836	0.942104
SKCM-Metastasis (n=368)	T cell CD4+ memory activated_CIBERSORT-ABS	-0.0307435	0.56426	0.768828
SKCM-Metastasis (n=368)	T cell CD4+ memory resting_CIBERSORT	-0.0327652	0.538913	0.754001
SKCM-Metastasis (n=368)	T cell CD4+ memory resting_CIBERSORT-ABS	-0.0447063	0.4017	0.649005
SKCM-Metastasis (n=368)	T cell CD4+ memory_XCELL	-0.156589	0.00313661	0.0246263
SKCM-Metastasis (n=368)	T cell CD4+ naive_CIBERSORT	-0.00879748	0.86899	0.949317
SKCM-Metastasis (n=368)	T cell CD4+ naive_CIBERSORT-ABS	-0.0127645	0.810855	0.91486
SKCM-Metastasis (n=368)	T cell CD4+ naive_XCELL	-0.0987007	0.0635954	0.218784
SKCM-Metastasis (n=368)	T cell CD4+ Th1_XCELL	0.114474	0.031297	0.135667
SKCM-Metastasis (n=368)	T cell CD4+ Th2_XCELL	0.0149009	0.779952	0.902502
SKCM-Metastasis (n=368)	T cell CD4+_EPIC	0.0129906	0.80757	0.913323
SKCM-Metastasis (n=368)	T cell CD4+_TIMER	-0.0909724	0.0874274	0.274112
SKCM-Primary (n=103)	NK cell activated_CIBERSORT	-0.197915	0.0461544	0.175387
SKCM-Primary (n=103)	NK cell activated_CIBERSORT-ABS	-0.151403	0.128758	0.353526
SKCM-Primary (n=103)	NK cell resting_CIBERSORT	0.229968	0.0200613	0.0943479
SKCM-Primary (n=103)	NK cell resting_CIBERSORT-ABS	0.237563	0.0162069	0.0810344
SKCM-Primary (n=103)	NK cell_EPIC	0.0693483	0.48857	0.714063
SKCM-Primary (n=103)	NK cell_MCPCOUNTER	-0.0942138	0.346252	0.610278
SKCM-Primary (n=103)	NK cell_QUANTISEQ	-0.12617	0.206373	0.454882
SKCM-Primary (n=103)	NK cell_XCELL	-0.0134677	0.893128	0.957643
SKCM-Primary (n=103)	T cell CD4+ (non-regulatory)_QUANTISEQ	0.128586	0.197746	0.445648
SKCM-Primary (n=103)	T cell CD4+ (non-regulatory)_XCELL	0.10885	0.276145	0.53816
SKCM-Primary (n=103)	T cell CD4+ central memory_XCELL	0.10013	0.316674	0.581714
SKCM-Primary (n=103)	T cell CD4+ effector memory_XCELL	-0.113561	0.255766	0.520295
SKCM-Primary (n=103)	T cell CD4+ memory activated_CIBERSORT	0.0652127	0.514922	0.736711
SKCM-Primary (n=103)	T cell CD4+ memory activated_CIBERSORT-ABS	0.0709581	0.478508	0.710286
SKCM-Primary (n=103)	T cell CD4+ memory resting_CIBERSORT	0.0137019	0.891281	0.956743
SKCM-Primary (n=103)	T cell CD4+ memory resting_CIBERSORT-ABS	0.0039766	0.968359	0.984479
SKCM-Primary (n=103)	T cell CD4+ memory_XCELL	-0.147527	0.138953	0.372432
SKCM-Primary (n=103)	T cell CD4+ naive_CIBERSORT	-0.0936959	0.348922	0.613844
SKCM-Primary (n=103)	T cell CD4+ naive_CIBERSORT-ABS	-0.0892903	0.372147	0.63385
SKCM-Primary (n=103)	T cell CD4+ naive_XCELL	-0.0434975	0.66422	0.83976
SKCM-Primary (n=103)	T cell CD4+ Th1_XCELL	-0.0174761	0.8616	0.946266
SKCM-Primary (n=103)	T cell CD4+ Th2_XCELL	0.068765	0.492242	0.717224
SKCM-Primary (n=103)	T cell CD4+_EPIC	0.0476864	0.634114	0.816271
SKCM-Primary (n=103)	T cell CD4+_TIMER	-0.130816	0.190017	0.439211
STAD (n=415)	NK cell activated_CIBERSORT	-0.0652046	0.205315	0.45466
STAD (n=415)	NK cell activated_CIBERSORT-ABS	-0.0644899	0.210336	0.458301
STAD (n=415)	NK cell resting_CIBERSORT	0.170107	0.000884355	0.00875143
STAD (n=415)	NK cell resting_CIBERSORT-ABS	0.147876	0.00391152	0.028366
STAD (n=415)	NK cell_EPIC	-0.0443956	0.388764	0.64008
STAD (n=415)	NK cell_MCPCOUNTER	-0.144948	0.00469174	0.0324404
STAD (n=415)	NK cell_QUANTISEQ	0.24133	2.00309e-06	5.76648e-05
STAD (n=415)	NK cell_XCELL	-0.0215117	0.676346	0.842278
STAD (n=415)	T cell CD4+ (non-regulatory)_QUANTISEQ	-0.0888361	0.0841391	0.266441
STAD (n=415)	T cell CD4+ (non-regulatory)_XCELL	0.0354358	0.49158	0.717224
STAD (n=415)	T cell CD4+ central memory_XCELL	0.0658182	0.201074	0.44946
STAD (n=415)	T cell CD4+ effector memory_XCELL	-0.0633452	0.218561	0.472969
STAD (n=415)	T cell CD4+ memory activated_CIBERSORT	-0.0182472	0.72327	0.869394
STAD (n=415)	T cell CD4+ memory activated_CIBERSORT-ABS	-0.0214624	0.677047	0.842278
STAD (n=415)	T cell CD4+ memory resting_CIBERSORT	0.0398897	0.438746	0.669034
STAD (n=415)	T cell CD4+ memory resting_CIBERSORT-ABS	-0.0729444	0.156403	0.396892
STAD (n=415)	T cell CD4+ memory_XCELL	-0.0886969	0.0846283	0.267099
STAD (n=415)	T cell CD4+ naive_CIBERSORT	-0.042585	0.40842	0.652692
STAD (n=415)	T cell CD4+ naive_CIBERSORT-ABS	-0.042585	0.40842	0.652692
STAD (n=415)	T cell CD4+ naive_XCELL	-0.224861	9.87683e-06	0.000234575
STAD (n=415)	T cell CD4+ Th1_XCELL	0.338222	1.35089e-11	1.83335e-09
STAD (n=415)	T cell CD4+ Th2_XCELL	0.0827116	0.10791	0.312007
STAD (n=415)	T cell CD4+_EPIC	-0.043339	0.400164	0.647625
STAD (n=415)	T cell CD4+_TIMER	-0.0776677	0.131219	0.359244
TGCT (n=150)	NK cell activated_CIBERSORT	0.318533	8.42589e-05	0.00139338
TGCT (n=150)	NK cell activated_CIBERSORT-ABS	0.141335	0.0877189	0.274121
TGCT (n=150)	NK cell resting_CIBERSORT	-0.0579112	0.485974	0.712461
TGCT (n=150)	NK cell resting_CIBERSORT-ABS	-0.0594516	0.474429	0.708094
TGCT (n=150)	NK cell_EPIC	-0.0267386	0.747848	0.883651
TGCT (n=150)	NK cell_MCPCOUNTER	0.108131	0.192352	0.441388
TGCT (n=150)	NK cell_QUANTISEQ	0.186215	0.02393	0.108773
TGCT (n=150)	NK cell_XCELL	0.0967236	0.243843	0.507647
TGCT (n=150)	T cell CD4+ (non-regulatory)_QUANTISEQ	0.076431	0.357514	0.619778
TGCT (n=150)	T cell CD4+ (non-regulatory)_XCELL	-0.0915577	0.270062	0.534014
TGCT (n=150)	T cell CD4+ central memory_XCELL	-0.10556	0.203201	0.452087
TGCT (n=150)	T cell CD4+ effector memory_XCELL	-0.228933	0.00528525	0.0355641
TGCT (n=150)	T cell CD4+ memory activated_CIBERSORT	0.0118024	0.887175	0.956743
TGCT (n=150)	T cell CD4+ memory activated_CIBERSORT-ABS	0.0107567	0.897114	0.958896
TGCT (n=150)	T cell CD4+ memory resting_CIBERSORT	-0.316545	9.38115e-05	0.00146439
TGCT (n=150)	T cell CD4+ memory resting_CIBERSORT-ABS	-0.318356	8.50694e-05	0.00139338
TGCT (n=150)	T cell CD4+ memory_XCELL	-0.156699	0.0580411	0.204219
TGCT (n=150)	T cell CD4+ naive_CIBERSORT	0.0954349	0.250212	0.511185
TGCT (n=150)	T cell CD4+ naive_CIBERSORT-ABS	0.0961069	0.246877	0.507647
TGCT (n=150)	T cell CD4+ naive_XCELL	-0.361042	7.03887e-06	0.000185748
TGCT (n=150)	T cell CD4+ Th1_XCELL	0.0167788	0.840144	0.933852
TGCT (n=150)	T cell CD4+ Th2_XCELL	0.358985	8.00452e-06	0.000200113
TGCT (n=150)	T cell CD4+_EPIC	0.00729242	0.930145	0.972994
TGCT (n=150)	T cell CD4+_TIMER	-0.459155	4.93457e-09	3.12522e-07
THCA (n=509)	NK cell activated_CIBERSORT	-0.0275589	0.543618	0.756131
THCA (n=509)	NK cell activated_CIBERSORT-ABS	-0.135146	0.00277561	0.022346
THCA (n=509)	NK cell resting_CIBERSORT	0.216263	1.41879e-06	4.34791e-05
THCA (n=509)	NK cell resting_CIBERSORT-ABS	0.214363	1.76201e-06	5.23096e-05
THCA (n=509)	NK cell_EPIC	-0.380109	3.19832e-18	1.0128e-15
THCA (n=509)	NK cell_MCPCOUNTER	0.0166429	0.713815	0.866059
THCA (n=509)	NK cell_QUANTISEQ	-0.0431503	0.341493	0.606279
THCA (n=509)	NK cell_XCELL	-0.0512963	0.25805	0.521453
THCA (n=509)	T cell CD4+ (non-regulatory)_QUANTISEQ	0.15625	0.000531944	0.00631684
THCA (n=509)	T cell CD4+ (non-regulatory)_XCELL	-0.0354042	0.435189	0.66859
THCA (n=509)	T cell CD4+ central memory_XCELL	0.0427863	0.345585	0.610233
THCA (n=509)	T cell CD4+ effector memory_XCELL	-0.23661	1.23152e-07	6.49968e-06
THCA (n=509)	T cell CD4+ memory activated_CIBERSORT	0.0219384	0.628775	0.81541
THCA (n=509)	T cell CD4+ memory activated_CIBERSORT-ABS	0.0218047	0.63087	0.81541
THCA (n=509)	T cell CD4+ memory resting_CIBERSORT	-0.134503	0.00290916	0.0231618
THCA (n=509)	T cell CD4+ memory resting_CIBERSORT-ABS	-0.153897	0.000646499	0.00719215
THCA (n=509)	T cell CD4+ memory_XCELL	-0.0951963	0.0355236	0.151334
THCA (n=509)	T cell CD4+ naive_CIBERSORT	0.0566219	0.211807	0.460449
THCA (n=509)	T cell CD4+ naive_CIBERSORT-ABS	0.0568726	0.209788	0.458301
THCA (n=509)	T cell CD4+ naive_XCELL	-0.103564	0.022132	0.103066
THCA (n=509)	T cell CD4+ Th1_XCELL	-0.235599	1.39799e-07	6.98997e-06
THCA (n=509)	T cell CD4+ Th2_XCELL	-0.154723	0.000603906	0.00686003
THCA (n=509)	T cell CD4+_EPIC	0.283929	1.68013e-10	1.77347e-08
THCA (n=509)	T cell CD4+_TIMER	-0.00746347	0.869375	0.949317
THYM (n=120)	NK cell activated_CIBERSORT	0.121824	0.194638	0.443419
THYM (n=120)	NK cell activated_CIBERSORT-ABS	0.144506	0.123359	0.342816
THYM (n=120)	NK cell resting_CIBERSORT	-0.2668	0.0039479	0.0284129
THYM (n=120)	NK cell resting_CIBERSORT-ABS	-0.250153	0.00701158	0.0444067
THYM (n=120)	NK cell_EPIC	-0.0141836	0.880411	0.953927
THYM (n=120)	NK cell_MCPCOUNTER	0.0745616	0.428389	0.663897
THYM (n=120)	NK cell_QUANTISEQ	0.180192	0.0539742	0.195708
THYM (n=120)	NK cell_XCELL	0.0289077	0.759088	0.893598
THYM (n=120)	T cell CD4+ (non-regulatory)_QUANTISEQ	0.23169	0.0127221	0.0675197
THYM (n=120)	T cell CD4+ (non-regulatory)_XCELL	0.0504971	0.591995	0.789345
THYM (n=120)	T cell CD4+ central memory_XCELL	-0.0815881	0.386039	0.64008
THYM (n=120)	T cell CD4+ effector memory_XCELL	-0.0759194	0.420003	0.656255
THYM (n=120)	T cell CD4+ memory activated_CIBERSORT	-0.0777598	0.408791	0.652692
THYM (n=120)	T cell CD4+ memory activated_CIBERSORT-ABS	-0.0620572	0.509989	0.731672
THYM (n=120)	T cell CD4+ memory resting_CIBERSORT	0.134	0.153367	0.391664
THYM (n=120)	T cell CD4+ memory resting_CIBERSORT-ABS	0.147876	0.11476	0.325438
THYM (n=120)	T cell CD4+ memory_XCELL	0.118044	0.208954	0.458301
THYM (n=120)	T cell CD4+ naive_CIBERSORT	-0.151713	0.105544	0.308417
THYM (n=120)	T cell CD4+ naive_CIBERSORT-ABS	-0.0816006	0.385966	0.64008
THYM (n=120)	T cell CD4+ naive_XCELL	-0.228181	0.0141796	0.07321
THYM (n=120)	T cell CD4+ Th1_XCELL	-0.347742	0.000140133	0.00201706
THYM (n=120)	T cell CD4+ Th2_XCELL	0.0814829	0.386654	0.64008
THYM (n=120)	T cell CD4+_EPIC	0.30854	0.000794184	0.00829093
THYM (n=120)	T cell CD4+_TIMER	-0.328567	0.000336988	0.0043262
UCEC (n=545)	NK cell activated_CIBERSORT	-0.147293	0.170857	0.410923
UCEC (n=545)	NK cell activated_CIBERSORT-ABS	-0.0881644	0.41403	0.653379
UCEC (n=545)	NK cell resting_CIBERSORT	0.133324	0.215588	0.467601
UCEC (n=545)	NK cell resting_CIBERSORT-ABS	0.124312	0.248515	0.509913
UCEC (n=545)	NK cell_EPIC	-0.251573	0.01806	0.0884379
UCEC (n=545)	NK cell_MCPCOUNTER	-0.154591	0.1504	0.387797
UCEC (n=545)	NK cell_QUANTISEQ	0.132103	0.21986	0.474697
UCEC (n=545)	NK cell_XCELL	-0.108517	0.314225	0.578515
UCEC (n=545)	T cell CD4+ (non-regulatory)_QUANTISEQ	0.13908	0.196245	0.444948
UCEC (n=545)	T cell CD4+ (non-regulatory)_XCELL	0.0719889	0.505075	0.728106
UCEC (n=545)	T cell CD4+ central memory_XCELL	-0.0848089	0.43209	0.666413
UCEC (n=545)	T cell CD4+ effector memory_XCELL	-0.146098	0.174392	0.412914
UCEC (n=545)	T cell CD4+ memory activated_CIBERSORT	-0.0916724	0.395627	0.645667
UCEC (n=545)	T cell CD4+ memory activated_CIBERSORT-ABS	-0.0933595	0.386952	0.64008
UCEC (n=545)	T cell CD4+ memory resting_CIBERSORT	0.111598	0.300596	0.563137
UCEC (n=545)	T cell CD4+ memory resting_CIBERSORT-ABS	0.0757415	0.483074	0.712029
UCEC (n=545)	T cell CD4+ memory_XCELL	-0.0291077	0.78777	0.906148
UCEC (n=545)	T cell CD4+ naive_CIBERSORT	0.061453	0.569508	0.772904
UCEC (n=545)	T cell CD4+ naive_CIBERSORT-ABS	0.0628647	0.560656	0.766365
UCEC (n=545)	T cell CD4+ naive_XCELL	-0.292254	0.00572754	0.0375252
UCEC (n=545)	T cell CD4+ Th1_XCELL	-0.203686	0.056984	0.201245
UCEC (n=545)	T cell CD4+ Th2_XCELL	0.262064	0.0136442	0.0708304
UCEC (n=545)	T cell CD4+_EPIC	0.193269	0.071208	0.234075
UCEC (n=545)	T cell CD4+_TIMER	-0.0920653	0.393596	0.645667
UCS (n=57)	NK cell activated_CIBERSORT	-0.0880856	0.530527	0.747775
UCS (n=57)	NK cell activated_CIBERSORT-ABS	-0.0710482	0.613176	0.803472
UCS (n=57)	NK cell resting_CIBERSORT	0.0320887	0.81957	0.920321
UCS (n=57)	NK cell resting_CIBERSORT-ABS	0.0351126	0.802893	0.913227
UCS (n=57)	NK cell_EPIC	-0.0715194	0.610818	0.802934
UCS (n=57)	NK cell_MCPCOUNTER	-0.194412	0.163033	0.403337
UCS (n=57)	NK cell_QUANTISEQ	0.166137	0.234465	0.494982
UCS (n=57)	NK cell_XCELL	0.0978923	0.485583	0.712461
UCS (n=57)	T cell CD4+ (non-regulatory)_QUANTISEQ	-0.0507769	0.71804	0.868965
UCS (n=57)	T cell CD4+ (non-regulatory)_XCELL	-0.186775	0.180525	0.42241
UCS (n=57)	T cell CD4+ central memory_XCELL	0.156108	0.264317	0.525316
UCS (n=57)	T cell CD4+ effector memory_XCELL	-0.0278183	0.843257	0.935857
UCS (n=57)	T cell CD4+ memory activated_CIBERSORT	0.0602025	0.668492	0.842264
UCS (n=57)	T cell CD4+ memory activated_CIBERSORT-ABS	0.0602025	0.668492	0.842264
UCS (n=57)	T cell CD4+ memory resting_CIBERSORT	-0.189244	0.174728	0.412914
UCS (n=57)	T cell CD4+ memory resting_CIBERSORT-ABS	-0.170351	0.222639	0.478523
UCS (n=57)	T cell CD4+ memory_XCELL	0.110538	0.430722	0.666413
UCS (n=57)	T cell CD4+ naive_CIBERSORT	0.285743	0.0380699	0.155221
UCS (n=57)	T cell CD4+ naive_CIBERSORT-ABS	0.285743	0.0380699	0.155221
UCS (n=57)	T cell CD4+ naive_XCELL	-0.0129829	0.926486	0.971481
UCS (n=57)	T cell CD4+ Th1_XCELL	-0.000890471	0.994951	0.99705
UCS (n=57)	T cell CD4+ Th2_XCELL	0.122146	0.38359	0.64008
UCS (n=57)	T cell CD4+_EPIC	0.218727	0.115601	0.326848
UCS (n=57)	T cell CD4+_TIMER	-0.0247015	0.860633	0.946266
UVM (n=80)	NK cell activated_CIBERSORT	-0.089134	0.440771	0.669973
UVM (n=80)	NK cell activated_CIBERSORT-ABS	-0.0956995	0.407712	0.652692
UVM (n=80)	NK cell resting_CIBERSORT	0.183025	0.111101	0.31791
UVM (n=80)	NK cell resting_CIBERSORT-ABS	0.198604	0.0833571	0.265736
UVM (n=80)	NK cell_EPIC	0.117588	0.308442	0.571189
UVM (n=80)	NK cell_MCPCOUNTER	-0.170357	0.138532	0.372432
UVM (n=80)	NK cell_QUANTISEQ	0.0948479	0.411917	0.653379
UVM (n=80)	NK cell_XCELL	-0.00227579	0.984328	0.992687
UVM (n=80)	T cell CD4+ (non-regulatory)_QUANTISEQ	0.0413509	0.721039	0.869273
UVM (n=80)	T cell CD4+ (non-regulatory)_XCELL	-0.159879	0.16485	0.404671
UVM (n=80)	T cell CD4+ central memory_XCELL	-0.119819	0.299289	0.56302
UVM (n=80)	T cell CD4+ effector memory_XCELL	-0.0168988	0.884023	0.956517
UVM (n=80)	T cell CD4+ memory activated_CIBERSORT	-0.122675	0.287836	0.547386
UVM (n=80)	T cell CD4+ memory activated_CIBERSORT-ABS	-0.125536	0.276654	0.53816
UVM (n=80)	T cell CD4+ memory resting_CIBERSORT	0.10072	0.38344	0.64008
UVM (n=80)	T cell CD4+ memory resting_CIBERSORT-ABS	0.0941438	0.415412	0.653379
UVM (n=80)	T cell CD4+ memory_XCELL	-0.42101	0.000137429	0.00200858
UVM (n=80)	T cell CD4+ naive_CIBERSORT	-0.0129079	0.911284	0.961911
UVM (n=80)	T cell CD4+ naive_CIBERSORT-ABS	-0.00436137	0.969971	0.984479
UVM (n=80)	T cell CD4+ naive_XCELL	-0.0233181	0.840467	0.933852
UVM (n=80)	T cell CD4+ Th1_XCELL	0.337185	0.00271099	0.0220123
UVM (n=80)	T cell CD4+ Th2_XCELL	0.0112046	0.922953	0.96966
UVM (n=80)	T cell CD4+_EPIC	0.0101271	0.930342	0.972994
UVM (n=80)	T cell CD4+_TIMER	0.06209	0.591652	0.789345
